# Supplementary material
Source: bioRxiv or medRxiv preprint supplement (https://www.biorxiv.org/highwire/filestream/1357/field_highwire_adjunct_files/1/005363-2.pdf)
Supplement: Supplementary file [file 005363-2.pdf]

# Brandvain and Coop.

## Sperm dependent female meiotic drive.

### Model I. Tadtional female drive

---

#### Set up

```
(*Allele and Genotype frequencies*)
ClearAll["Global`*"]
fA = 1 - fB;
fAA = fA^2 + fA fB x;
fAB = 2 fA fB (1 - x);
fBB = fB^2 + fA fB x;
```

#### Drive

```
fAAdrive = FullSimplify[fA (fAA + fAB (1 - d))];
fABdrive = FullSimplify[fA (fBB + fAB d) + fB (fAA + fAB (1 - d))];
fBBdrive = FullSimplify[fB (fAB d + fBB)];
```

#### Selection

```
wAA = 1; wAB = 1 - hs; wBB = 1 - s; (*genotypic fitnesses*)
 $\bar{w}$  = FullSimplify[fAAdrive wAA + fABdrive wAB + fBBdrive wBB]; (*mean fitness*)
fAAsel = FullSimplify[(fAAdrive * wAA) /  $\bar{w}$ ];
fABsel = FullSimplify[(fABdrive * wAB) /  $\bar{w}$ ];
fBBsel = FullSimplify[(fBBdrive wBB) /  $\bar{w}$ ];
fAsel = FullSimplify[fAAsel + fABsel / 2];
fBsel = FullSimplify[fBBsel + fABsel / 2];
 $\Delta fA$  = FullSimplify[fAsel - fA];
 $\Delta fB$  = FullSimplify[fBsel - fB];
```

---

#### Analysis

For all analyses we assume HWE (i.e.  $x = 0$ ), we relax this assumption in numerical iterations

## Invasion

$$\text{scaledDeltaDriveWhenRare} = (\text{FullSimplify}[\Delta fB / (fB * (1 - fB)) /. x \rightarrow 0] /. fB \rightarrow 0)$$

$$\frac{1}{2} (-1 - 2d(-1 + hs) - hs)$$

Noting that the change in frequency of a standard driver is independent of  $s$  when rare, we solve for the value of  $hs$  required for invasion.

$$\text{invasionCrit} = \text{Solve}[\text{scaledDeltaDriveWhenRare} == 0, hs]$$

$$\left\{ \left\{ hs \rightarrow \frac{-1 + 2d}{1 + 2d} \right\} \right\}$$

## Fixation

$$\text{scaledDeltaDriveWhenCommon} = (\text{FullSimplify}[\Delta fB / (fB * (1 - fB)) /. x \rightarrow 0] /. fB \rightarrow 1)$$

$$\frac{1 + hs + 2(d(-1 + hs) - 2hs + s)}{2(-1 + s)}$$

We solve for fixation conditions when recessive or not.

$$\text{fixationCritRecessive} = \text{Solve}[\text{scaledDeltaDriveWhenCommon} == 0, s] /. hs \rightarrow 0$$

$$\text{fixationCritNotRecessive} = \text{Solve}[\text{scaledDeltaDriveWhenCommon} == 0, s]$$

$$\left\{ \left\{ s \rightarrow \frac{1}{2} (-1 + 2d) \right\} \right\}$$

$$\left\{ \left\{ s \rightarrow \frac{1}{2} (-1 + 2d + 3hs - 2dhs) \right\} \right\}$$

## Equilibrium

We identify the equilibrium frequency of the standard driver

$$\text{eqfB} = \text{Solve}[(\text{FullSimplify}[\Delta fB /. x \rightarrow 0]) == 0, fB][[4]]$$

$$\left\{ fB \rightarrow \frac{8dhs - 4ds + \sqrt{-4(1 - 2d + hs + 2dhs)(-4hs + 8dhs + 2s - 4ds) + (-8dhs + 4ds)^2}}{2(-4hs + 8dhs + 2s - 4ds)} \right\}$$

We plot this equilibrium frequency assuming a recessive fitness cost.

```
ContourPlot[If[fB > 1, 1 / 0, If[fB < 0, 1 / 0, fB]] /. eqfB /. hs -> 0, {d, .5, 1},
  {s, 0, 1}, PlotLegends -> BarLegend[Automatic, LegendLabel -> "fB*"], PlotLabel ->
  "Equilibrium frequency of a standard driver with a recessive fitness cost",
  FrameLabel -> {"d (drive of the B allele)",
    "s (selection against driver, assuming recessive fitness cost)"}]
```

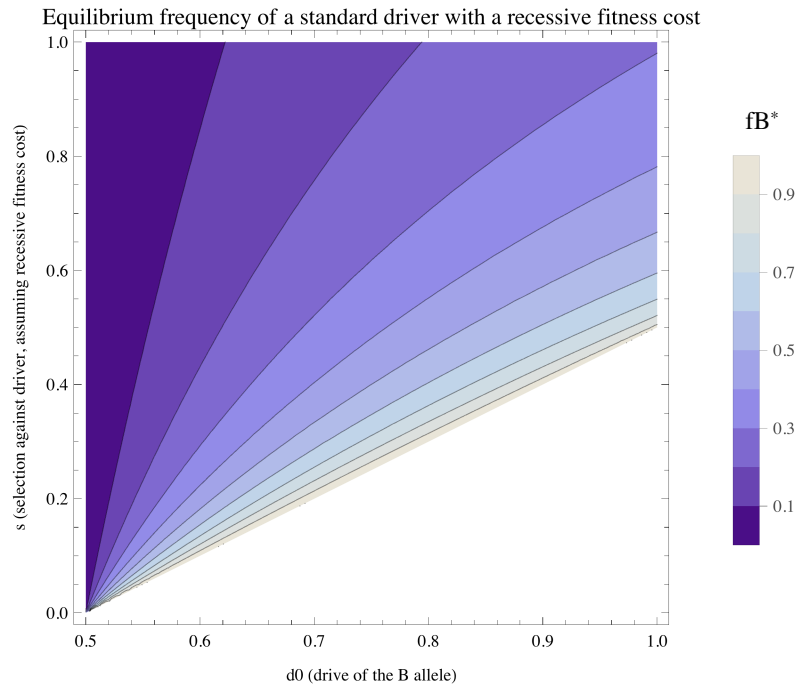

```
FullSimplify[fAADrive + fABDrive + fBBDrive]
```

1

## Model 2. Female drive depends on sperm haplotype (single pleiotropic locus)

The B allele is transmitted with probability,  $d$ , in heterozygous females when fertilized by B-bearing sperm.

$x$  represents the deviation from Hardy - Weinberg Equilibrium

### Setup

```
(*Allele and Genotype frequencies*)
ClearAll["Global`*"]
fA = 1 - fB;
fAA = fA^2 + fA fB x;
fAB = 2 fA fB (1 - x);
fBB = fB^2 + fA fB x;
```

## Drive

```
(*Genotype frequencies after drive*)
fAA_Drive = FullSimplify[fA (fAA + fAB / 2)];
fAB_Drive = FullSimplify[fB (fAA + fAB * (1 - d)) + fA (fAB / 2 + fBB)];
fBB_Drive = FullSimplify[fB (fAB d + fBB)];
```

## Selection

```
wAA = 1; wAB = 1 - hs; wBB = 1 - s; (*genotypic fitnesses*)
W_bar = FullSimplify[fAA_Drive wAA + fAB_Drive wAB + fBB_Drive wBB]; (*mean fitness*)
fAA_Sel = FullSimplify[(fAA_Drive * wAA) / W_bar];
fAB_Sel = FullSimplify[(fAB_Drive * wAB) / W_bar];
fBB_Sel = FullSimplify[(fBB_Drive wBB) / W_bar];
fA_Sel = FullSimplify[fAA_Sel + fAB_Sel / 2];
fB_Sel = FullSimplify[fBB_Sel + fAB_Sel / 2];
ΔfA = FullSimplify[fA_Sel - fA];
ΔfB = FullSimplify[fB_Sel - fB];
```

---

## Analysis

Note, we assume no deviation from Hardy-Weinberg [i.e.  $x=0$ ] for all analytical results, and therefore these answers are approximations. In the supplementary material we show that results of exact recursions are remarkably consistent from these approximate analytical solutions.

### Assuming the cost of drive is fully recessive [i.e. $hs$ is zero]

#### Invasion

```
ΔfB_invasive = (FullSimplify[ΔfB /. hs → 0 /. x → 0] / fB^2 /. fB → 0)
```

$$\frac{1}{2} (-1 + d (2 - 4 s))$$

```
spermDepRecessiveInvasive = Solve[ΔfB_invasive == 0, s]
```

$$\left\{ \left\{ s \rightarrow \frac{-1 + 2 d}{4 d} \right\} \right\}$$

```
plotInvasion4spermDepRecessive =
```

```
Plot[s /. spermDepRecessiveInvasive [[1]], {d, .5, 1}, PlotStyle → {Black, Thick}];
```

```
plotRelChange4RarespermDepRecessive = ContourPlot[{ΔfB_invasive}, {d, 0.5, 1},
  {s, 0, 1}, PlotLegends → BarLegend[Automatic, LegendLabel → "scaled ΔB"],
  FrameLabel → {"d (drive)", "s (selection)"},
  PlotLabel → "Invasion of recessive sperm dependent driver"];
```

```
Show[plotRelChange4RarespermDepRecessive, plotInvasion4spermDepRecessive]
```

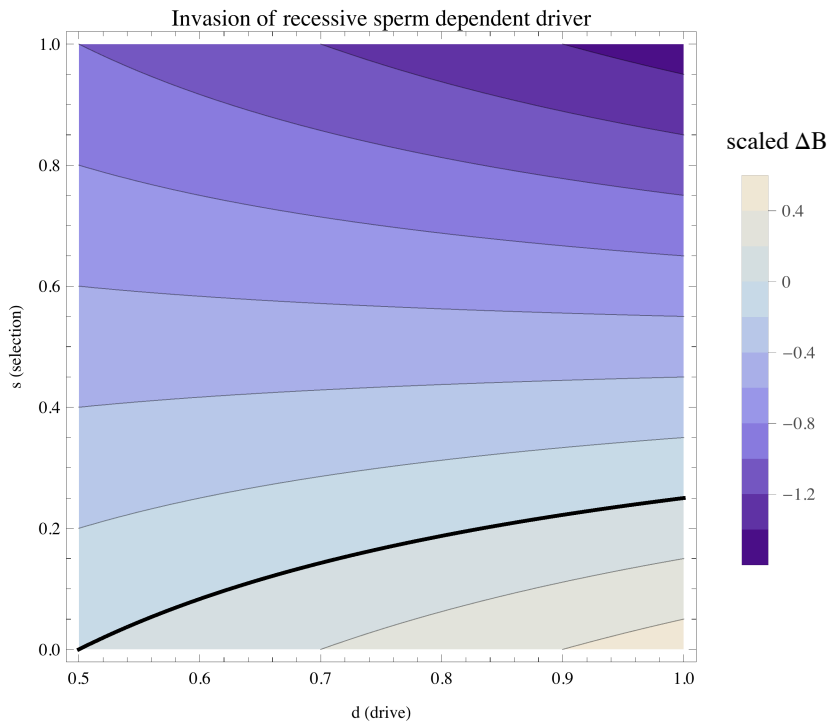

## Fixation

```
 $\Delta f_{Bfix} = \text{FullSimplify}[\text{FullSimplify}[\Delta f_B /. h_s \rightarrow 0 /. x \rightarrow 0] / f_A] /. f_B \rightarrow 1$ 
```

$$\frac{-1 + 2d - 2s}{2 - 2s}$$

```
spermDepRecessiveFix = Solve[ $\Delta f_{Bfix} == 0$ , s]
```

$$\left\{ \left\{ s \rightarrow \frac{1}{2} (-1 + 2d) \right\} \right\}$$

```
(s /. spermDepRecessiveFix [[1]])
```

$$\frac{1}{2} (-1 + 2d)$$

```
plotFixation4spermDepRecessive =
```

```
Plot[s /. spermDepRecessiveFix [[1]], {d, .5, 1}, PlotStyle -> {Red, Thick}];
```

```
(*Note we artificially rescaled z to be -.1 for all negative values*)
```

```
plotRelChange4CommonSpermDepRecessive =
```

```
ContourPlot[If[s > (s /. spermDepRecessiveFix [[1]]), -.1,  $\Delta f_{Bfix}$ ], {d, 0.5, 1},
{s, 0, 1}, PlotLegends -> BarLegend[Automatic, LegendLabel -> "scaled  $\Delta B$ "],
FrameLabel -> {"d (drive)", "s (selection)"},
PlotLabel -> "Fixation of recessive sperm dependent driver"];
```

```
Show[plotRelChange4CommonSpermDepRecessive, plotFixation4spermDepRecessive]
```

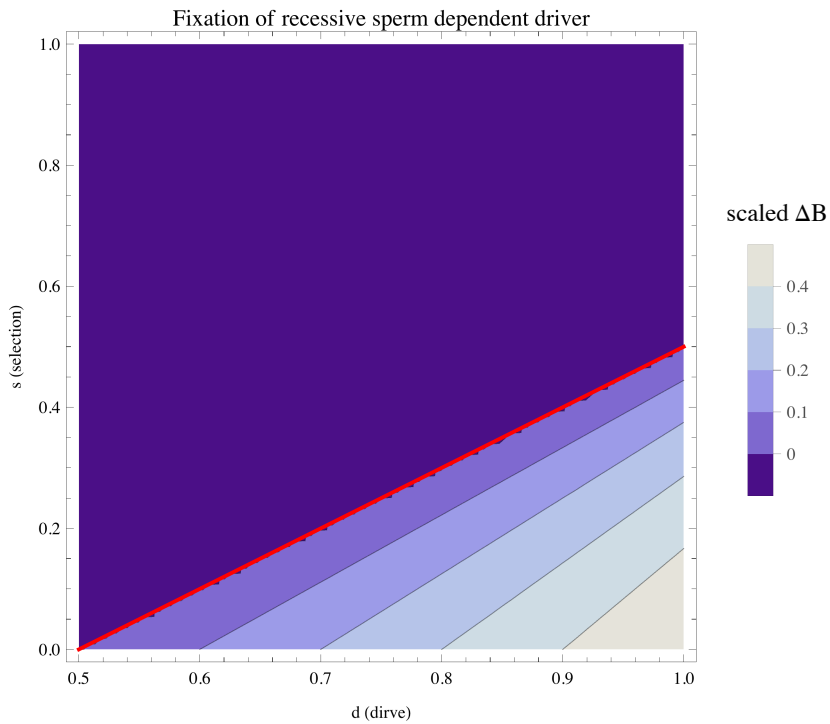

## Bistability Point

```
FBbistabSpermDepRecessive = Solve[FullSimplify[ $\Delta fB /. hs \rightarrow 0 /. x \rightarrow 0$ ] == 0, fB][[4]]
```

$$\left\{ fB \rightarrow \frac{1 - 2d + 4ds}{-2s + 4ds} \right\}$$

```
bistab = ContourPlot[(If[fB < 0, 0, If[fB > 1, 1, fB]]) /. FBbistabSpermDepRecessive,
  {d, .5, 1}, {s, 0, 1}, PlotLegends → BarLegend[Automatic, LegendLabel → "fB*"],
  FrameLabel → {"d (dirve)", "s (selection)"}, PlotLabel →
  "Threshold frequency for fixation of recessive self-promoting driver"];
```

Show[bistab, plotFixation4spermDepRecessive, plotInvasion4spermDepRecessive]

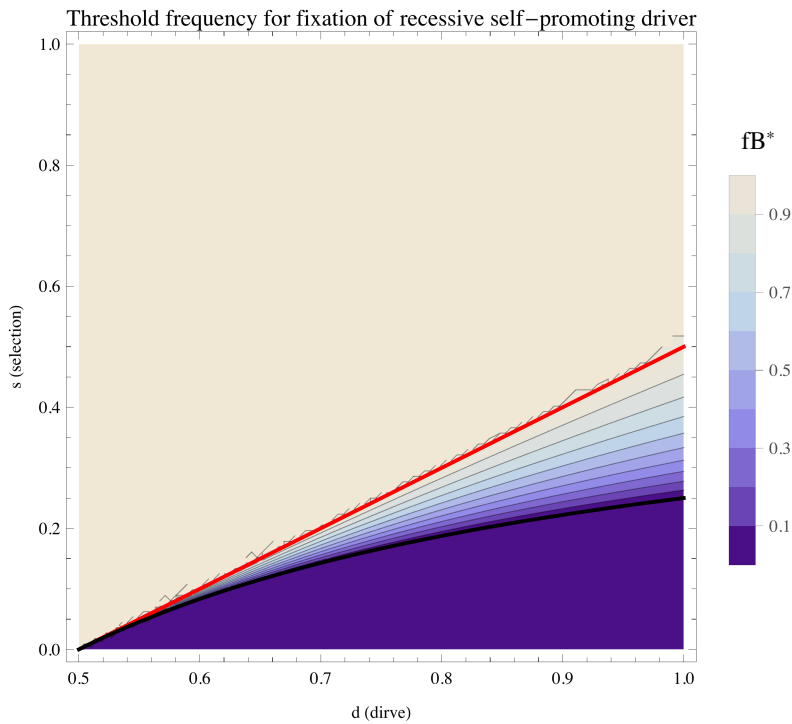

**Assuming the cost of drive is not fully recessive [i.e.  $h_s$  is nonzero]**

### Invasion

Note with any heterozygous cost (i.e.  $h_s > 0$ ) a self-promoting driver cannot invade

`FullSimplify[FullSimplify[ $\Delta f_B /. x \rightarrow 0$ ] /  $f_B$ ] /.  $f_B \rightarrow 0$`

-  $h_s$

### Fixation

`$\Delta f_{Bfix} = \text{FullSimplify}[\text{FullSimplify}[\text{FullSimplify}[\Delta f_B /. x \rightarrow 0] / f_A] /. f_B \rightarrow 1]$`

$$\frac{1 + 2d(-1 + h_s) - 3h_s + 2s}{2(-1 + s)}$$

`spermDepNotRecessiveFix = Solve[ $\Delta f_{Bfix} == 0$ , s]`

$$\left\{ \left\{ s \rightarrow \frac{1}{2}(-1 + 2d + 3h_s - 2dh_s) \right\} \right\}$$

`spermDepAddFix = Solve[ $\Delta f_{Bfix} == 0 /. h_s \rightarrow s/2$ , s]`

$$\left\{ \left\{ s \rightarrow \frac{2(-1 + 2d)}{1 + 2d} \right\} \right\}$$

```
plotspermDepAddFix =
  Plot[s /. spermDepAddRecessiveFix, {d, .5, 1}, PlotStyle -> {Red, Thick}];
```

## Bistability Point

```
FBbistabSpermDepNotRecessive = Solve[FullSimplify[ΔfB /. x -> 0] == 0, fB][[3]]
```

$$\left\{ fB \rightarrow \left( -1 + 2d + 3hs + 2dhs - 4ds - \sqrt{-8hs(-2hs + 4dhs + 2s - 4ds) + (1 - 2d - 3hs - 2dhs + 4ds)^2} \right) / (2(-2hs + 4dhs + 2s - 4ds)) \right\}$$

An Example of a non - recessive driver [Assuming additivity]

```
bistab = ContourPlot[
  (If[fB < 0, 0, If[fB > 1, 1, fB]]) /. FBbistabSpermDepNotRecessive /. hs -> (s / 2),
  {d, .5, 1}, {s, 0, 1}, PlotLegends -> BarLegend[Automatic, LegendLabel -> "fB*"],
  FrameLabel -> {"d (dirve)", "s (selection)"}, PlotLabel ->
  "Threshold frequency for fixation of recessive self-promoting driver";
```

```
Show[bistab, plotspermDepAddFix]
```

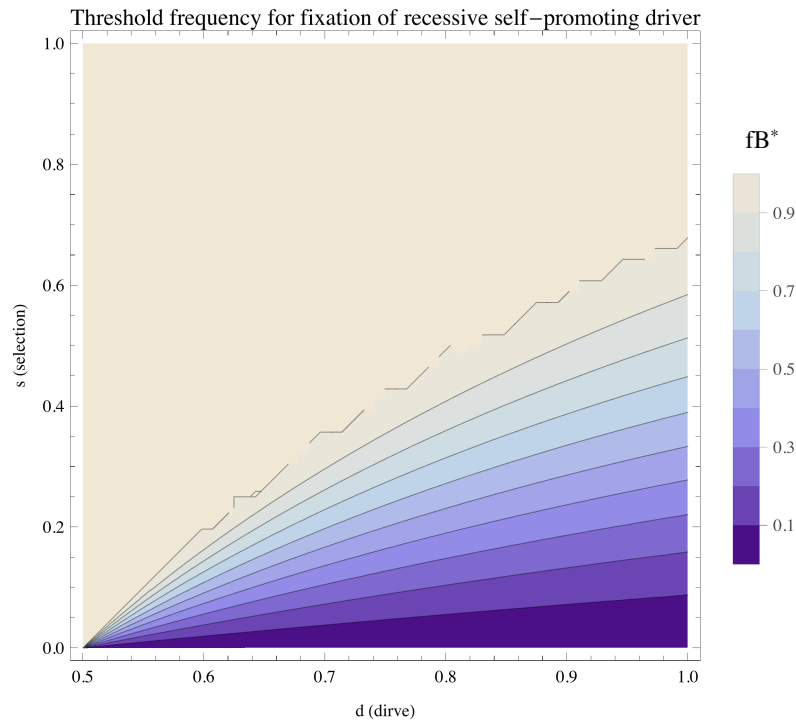



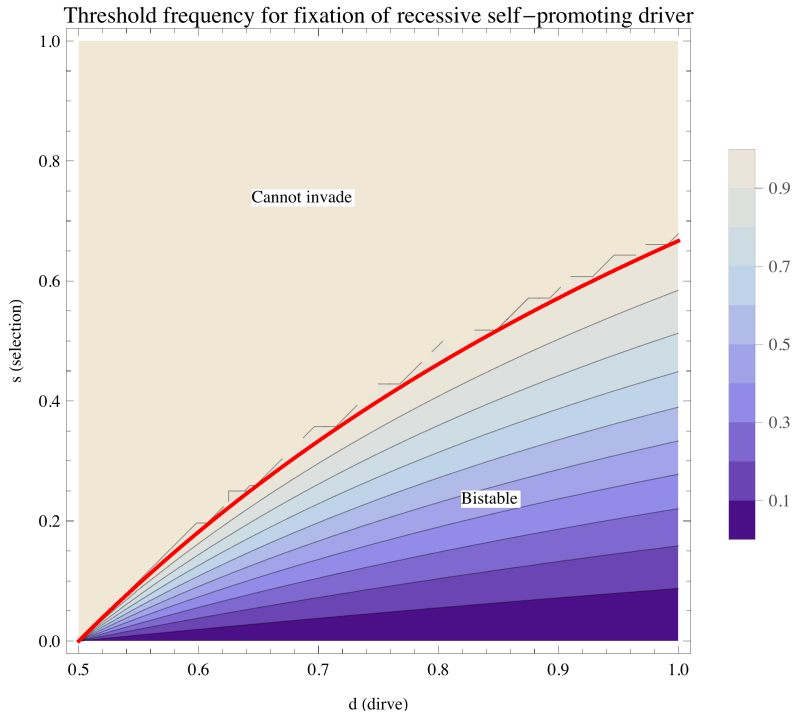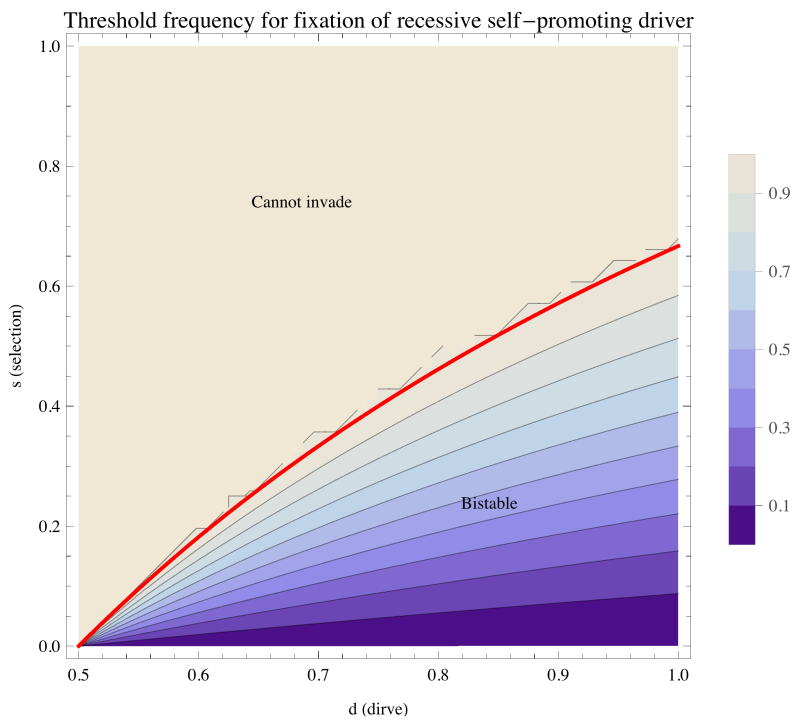

## Model 3. Female drive depends on male genotype (single pleiotropic locus)

The B allele is transmitted with probability,  $d$  and  $d_h$ , in heterozygous females when fertilized BB and AB males, respectively.

$x$  represents the deviation from Hardy - Weinberg Equilibrium

### Setup

```
(*Allele and Genotype frequencies*)
ClearAll["Global`*"]
fA = 1 - fB;
fAA = fA^2 + fA fB x;
fAB = 2 fA fB (1 - x);
fBB = fB^2 + fA fB x;
```

### Drive

```
(*Genotype frequencies after drive*)
fAA_drive = FullSimplify[fAA (fAA + fAB / 2) + fAB (fAA / 2 + fAB (1 - d_het) / 2)];
fAB_drive = FullSimplify[
  fAA (fAB / 2 + fBB) + fAB (fAA / 2 + fAB / 2 + fBB (1 - d_hom)) + fBB (fAA + fAB / 2)];
fBB_drive = FullSimplify[fAB (fAB d_het / 2 + fBB d_hom) + fBB (fAB / 2 + fBB)];
```

### Selection

```
wAA = 1; wAB = 1 - hs; wBB = 1 - s; (*genotypic fitnesses*)
W_bar = FullSimplify[fAA_drive wAA + fAB_drive wAB + fBB_drive wBB]; (*mean fitness*)
fAA_sel = FullSimplify[(fAA_drive * wAA) / W_bar];
fAB_sel = FullSimplify[(fAB_drive * wAB) / W_bar];
fBB_sel = FullSimplify[(fBB_drive wBB) / W_bar];
fA_sel = FullSimplify[fAA_sel + fAB_sel / 2];
fB_sel = FullSimplify[fBB_sel + fAB_sel / 2];
ΔfA = FullSimplify[fA_sel - fA];
ΔfB = FullSimplify[fB_sel - fB];
```

```
FullSimplify[fAADrive + fABDrive + fBBDrive]
```

```
1
```

## Analysis

### Analytical example - recessive fitness cost

#### Invasion

```
invasion4maleDepRecessive =
  Solve[((FullSimplify[(ΔfB /. x → 0 /. hs → 0)] / fB^2) /. fB → 0) == 0, s]
```

$$\left\{ \left\{ s \rightarrow \frac{-1 + 2 d_{\text{het}}}{2 d_{\text{het}}} \right\} \right\}$$

```
plotInvasion4maleDepRecessive =
  Plot[s /. invasion4maleDepRecessive /. dhet -> dhom,
    {dhom, .5, 1}, PlotStyle -> {Black, Thick}];
```

#### Fixation

```
fixation4maleDepRecessive =
  Solve[(FullSimplify[(FullSimplify[(ΔfB /. x → 0 /. hs → 0) / fA] /. fB → 1])] == 0, s]
```

$$\left\{ \left\{ s \rightarrow \frac{1}{2} (-1 + 2 d_{\text{hom}}) \right\} \right\}$$

```
plotFixation4maleDepRecessive = Plot[s /. fixation4maleDepRecessive /. dhet -> dhom,
  {dhom, .5, 1}, PlotStyle -> {Red, Thick}];
```

```
Show[Plot[0, {dhom, 0.5, 1}, AxesLabel -> {"d (drive) assuming dhet=dhom=d",
  "s (selection against drive homozygotes)"}, PlotRange -> {{.5, 1}, {0, .5}},
  PlotLabel -> "Invasion and fixation conditions for a male dependent driver"],
  plotFixation4maleDepRecessive, plotInvasion4maleDepRecessive]
```

Invasion and fixation conditions for a male dependent driver  
s (selection against drive homozygotes)

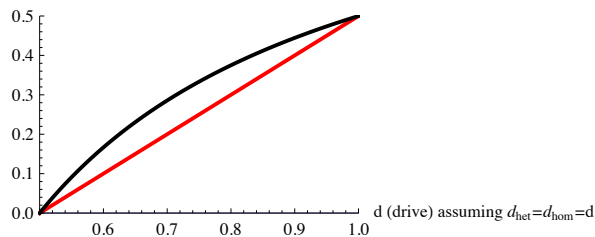

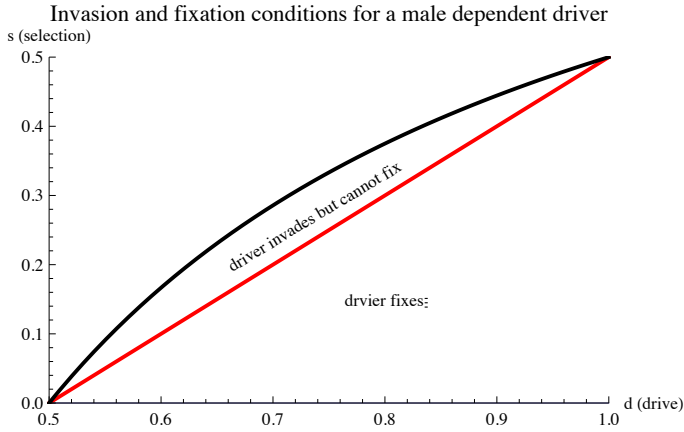

## Equilibrium

**FBeqMaleepRecessive =**

**Solve[FullSimplify[ $\Delta fB /. x \rightarrow 0 /. hs \rightarrow 0 /. d_{het} \rightarrow d_{hom} == 0, fB][[4]]$**

$$\left\{ fB \rightarrow \frac{2 (1 - 2 d_{hom} + 2 s d_{hom})}{(-1 + 2 s) (-1 + 2 d_{hom})} \right\}$$

```
eqfig = ContourPlot[ (If[fB < 0, 0, If[fB > 1, 1, fB]) /. FBeqMaleepRecessive,
  {dhom, 0.5, 1}, {s, 0, .5}, PlotLegends → BarLegend[Automatic, LegendLabel → "fB*"],
  FrameLabel → {"d (drive) assuming dhet=dhom=d",
    "s (selection, assuming recessive fitness cost)"}];
```

**Show[eqfig, plotInvasion4maleDepRecessive, plotFixation4maleDepRecessive]**

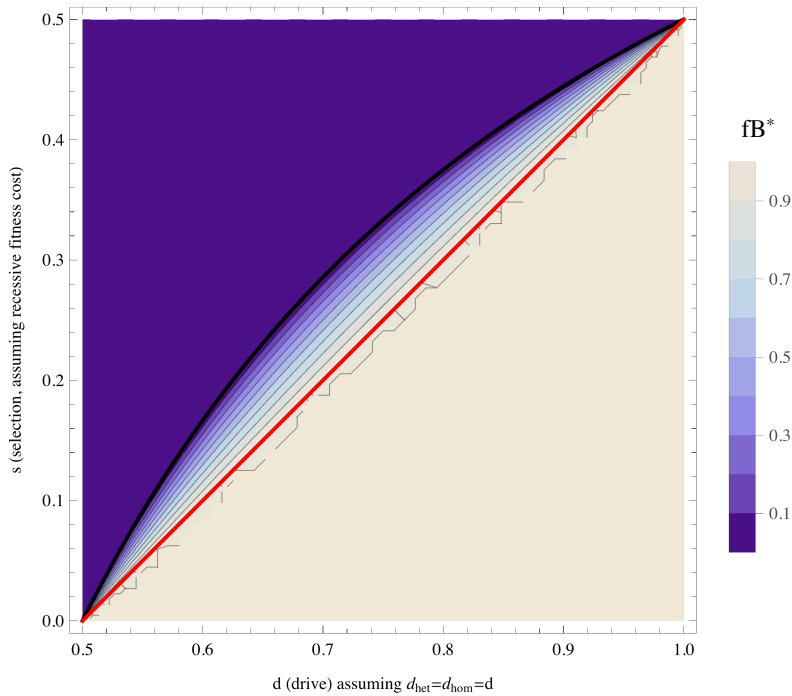

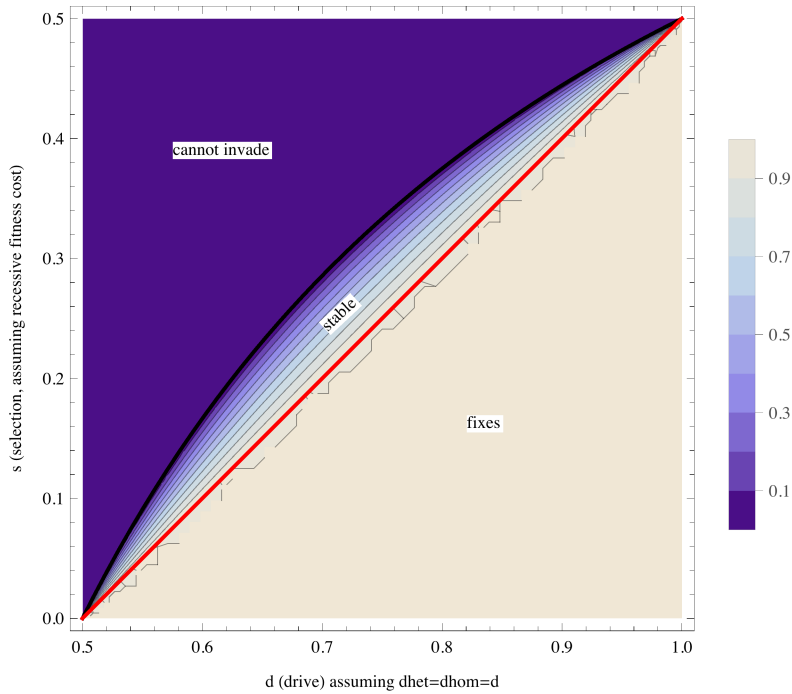

## Model 4. Female drive depends on sperm haplotype (two tightly linked, loci in coupling phase)

We have one locus with two alleles, A (non-driving) and B (traditional driver), as well as a tightly linked locus where one allele modifies drive. Assuming no recombination this functions as a third allele, C. This tightly-linked locus is on the B background.

When C increases drive in heterozygous females it fertilizes, it is a drive enhancer (the B+ allele in our ms).

When C decreases drive in heterozygous females it fertilizes, it is a drive suppressor (the B- allele in our ms).

## Setup

```

ClearAll["Global`*"]
fA = .
fAA = .
fAB = .
fAC = .
fBB = .
fBC = .
fCC = .
minormod = {d1 -> d0 + ε}
(*assuming the sperm acting modifier additively increases drive by epsilon*)
SUMTOONE = {fA -> 1 - (fB + fC)};
HWE =
  {fAA -> fA^2, fAB -> 2 fA fB, fAC -> 2 fA fC, fBB -> fB^2, fBC -> 2 fB fC, fCC -> fC^2};
GENOFREQS = {fA -> fAA + fAB / 2 + fAC / 2,
  fB -> fBB + fAB / 2 + fBC / 2, fC -> fCC + fBC / 2 + fFC / 2};

```

## Drive

(\*Here we caculate all genotypes after drive. For book-keeping purposes we distinguish between reciprocal homozygotes, but remove this distinction belowsum them below\*)

```

AAAn =
  FullSimplify[fAA * fAA * 1 + fAA * fAB * 1 / 2 + fAA * fAC * 1 / 2 + fAA * fBB * 0 + fAA * fBC * 0 +
    fAA * fCC * 0 + fAB * fAA * (1 - d0) + fAB * fAB * (1 - d0) / 2 + fAB * fAC * (1 - d0) / 2 +
    fAB * fBB * 0 + fAB * fBC * 0 + fAB * fCC * 0 + fAC * fAA * (1 - d0) + fAC * fAB * (1 - d0) / 2 +
    fAC * fAC * (1 - d0) / 2 + fAC * fBB * 0 + fAC * fBC * 0 + fAC * fCC * 0 + fBB * fAA * 0 +
    fBB * fAB * 0 + fBB * fAC * 0 + fBB * fBB * 0 + fBB * fBC * 0 + fBB * fCC * 0 + fBC * fAA * 0 +
    fBC * fAB * 0 + fBC * fAC * 0 + fBC * fBB * 0 + fBC * fBC * 0 + fBC * fCC * 0 + fCC * fAA * 0 +
    fCC * fAB * 0 + fCC * fAC * 0 + fCC * fBB * 0 + fCC * fBC * 0 + fCC * fCC * 0 + 0];
ABn = FullSimplify[fAA * fAA * 0 + fAA * fAB * 1 / 2 + fAA * fAC * 0 + fAA * fBB * 1 +
  fAA * fBC * 1 / 2 + fAA * fCC * 0 + fAB * fAA * 0 + fAB * fAB * (1 - d0) / 2 +
  fAB * fAC * 0 + fAB * fBB * (1 - d0) + fAB * fBC * (1 - d0) / 2 + fAB * fCC * 0 +
  fAC * fAA * 0 + fAC * fAB * (1 - d0) / 2 + fAC * fAC * 0 + fAC * fBB * (1 - d0) +
  fAC * fBC * (1 - d0) / 2 + fAC * fCC * 0 + fBB * fAA * 0 + fBB * fAB * 0 + fBB * fAC * 0 +
  fBB * fBB * 0 + fBB * fBC * 0 + fBB * fCC * 0 + fBC * fAA * 0 + fBC * fAB * 0 +
  fBC * fAC * 0 + fBC * fBB * 0 + fBC * fBC * 0 + fBC * fCC * 0 + fCC * fAA * 0 +
  fCC * fAB * 0 + fCC * fAC * 0 + fCC * fBB * 0 + fCC * fBC * 0 + fCC * fCC * 0 + 0];
ACn = FullSimplify[fAA * fAA * 0 + fAA * fAB * 0 + fAA * fAC * 1 / 2 + fAA * fBB * 0 +
  fAA * fBC * 1 / 2 + fAA * fCC * 1 + fAB * fAA * 0 + fAB * fAB * 0 + fAB * fAC * (1 - d1) / 2 +
  fAB * fBB * 0 + fAB * fBC * (1 - d1) / 2 + fAB * fCC * (1 - d1) + fAC * fAA * 0 + fAC * fAB * 0 +
  fAC * fAC * (1 - d1) / 2 + fAC * fBB * 0 + fAC * fBC * (1 - d1) / 2 + fAC * fCC * (1 - d1) +
  fBB * fAA * 0 + fBB * fAB * 0 + fBB * fAC * 0 + fBB * fBB * 0 + fBB * fBC * 0 + fBB * fCC * 0 +
  fBC * fAA * 0 + fBC * fAB * 0 + fBC * fAC * 0 + fBC * fBB * 0 + fBC * fBC * 0 + fBC * fCC * 0 +
  fCC * fAA * 0 + fCC * fAB * 0 + fCC * fAC * 0 + fCC * fBB * 0 + fCC * fBC * 0 + fCC * fCC * 0 + 0];
BAAn = FullSimplify[fAA * fAA * 0 + fAA * fAB * 0 + fAA * fAC * 0 + fAA * fBB * 0 + fAA * fBC * 0 +
  fAA * fCC * 0 + fAB * fAA * d0 + fAB * fAB * d0 / 2 + fAB * fAC * d0 / 2 + fAB * fBB * 0 +
  fAB * fBC * 0 + fAB * fCC * 0 + fAC * fAA * 0 + fAC * fAB * 0 + fAC * fAC * 0 + fAC * fBB * 0 +
  fAC * fBC * 0 + fAC * fCC * 0 + fBB * fAA * 1 + fBB * fAB * 1 / 2 + fBB * fAC * 1 / 2 +
  fBB * fBB * 0 + fBB * fBC * 0 + fBB * fCC * 0 + fBC * fAA * 1 / 2 + fBC * fAB * 1 / 4 +

```

```

    fBC * fAC * 1 / 4 + fBC * fBB * 0 + fBC * fBC * 0 + fBC * fCC * 0 + fCC * fAA * 0 +
    fCC * fAB * 0 + fCC * fAC * 0 + fCC * fBB * 0 + fCC * fBC * 0 + fCC * fCC * 0 + 0];
BBn = FullSimplify[fAA * fAA * 0 + fAA * fAB * 0 + fAA * fAC * 0 + fAA * fBB * 0 + fAA * fBC * 0 +
    fAA * fCC * 0 + fAB * fAA * 0 + fAB * fAB * d0 / 2 + fAB * fAC * 0 + fAB * fBB * d0 +
    fAB * fBC * d0 / 2 + fAB * fCC * 0 + fAC * fAA * 0 + fAC * fAB * 0 + fAC * fAC * 0 +
    fAC * fBB * 0 + fAC * fBC * 0 + fAC * fCC * 0 + fBB * fAA * 0 + fBB * fAB * 1 / 2 + fBB * fAC * 0 +
    fBB * fBB * 1 + fBB * fBC * 1 / 2 + fBB * fCC * 0 + fBC * fAA * 0 + fBC * fAB * 1 / 4 +
    fBC * fAC * 0 + fBC * fBB * 1 / 2 + fBC * fBC * 1 / 4 + fBC * fCC * 0 + fCC * fAA * 0 +
    fCC * fAB * 0 + fCC * fAC * 0 + fCC * fBB * 0 + fCC * fBC * 0 + fCC * fCC * 0 + 0];
BCn = FullSimplify[fAA * fAA * 0 + fAA * fAB * 0 + fAA * fAC * 0 + fAA * fBB * 0 +
    fAA * fBC * 0 + fAA * fCC * 0 + fAB * fAA * 0 + fAB * fAB * 0 + fAB * fAC * (d1) / 2 +
    fAB * fBB * 0 + fAB * fBC * (d1) / 2 + fAB * fCC * d1 + fAC * fAA * 0 + fAC * fAB * 0 +
    fAC * fAC * 0 + fAC * fBB * 0 + fAC * fBC * 0 + fAC * fCC * 0 + fBB * fAA * 0 + fBB * fAB * 0 +
    fBB * fAC * 1 / 2 + fBB * fBB * 0 + fBB * fBC * 1 / 2 + fBB * fCC * 1 + fBC * fAA * 0 +
    fBC * fAB * 0 + fBC * fAC * 1 / 4 + fBC * fBB * 0 + fBC * fBC * 1 / 4 + fBC * fCC * 1 / 2 +
    fCC * fAA * 0 + fCC * fAB * 0 + fCC * fAC * 0 + fCC * fBB * 0 + fCC * fBC * 0 + fCC * fCC * 0 + 0];
CAN = FullSimplify[fAA * fAA * 0 + fAA * fAB * 0 + fAA * fAC * 0 + fAA * fBB * 0 +
    fAA * fBC * 0 + fAA * fCC * 0 + fAB * fAA * 0 + fAB * fAB * 0 + fAB * fAC * 0 + fAB * fBB * 0 +
    fAB * fBC * 0 + fAB * fCC * 0 + fAC * fAA * d0 + fAC * fAB * d0 / 2 + fAC * fAC * d0 / 2 +
    fAC * fBB * 0 + fAC * fBC * 0 + fAC * fCC * 0 + fBB * fAA * 0 + fBB * fAB * 0 + fBB * fAC * 0 +
    fBB * fBB * 0 + fBB * fBC * 0 + fBB * fCC * 0 + fBC * fAA * 1 / 2 + fBC * fAB * 1 / 4 +
    fBC * fAC * 1 / 4 + fBC * fBB * 0 + fBC * fBC * 0 + fBC * fCC * 0 + fCC * fAA * 1 +
    fCC * fAB * 1 / 2 + fCC * fAC * 1 / 2 + fCC * fBB * 0 + fCC * fBC * 0 + fCC * fCC * 0 + 0];
CBn = FullSimplify[fAA * fAA * 0 + fAA * fAB * 0 + fAA * fAC * 0 + fAA * fBB * 0 + fAA * fBC * 0 +
    fAA * fCC * 0 + fAB * fAA * 0 + fAB * fAB * 0 + fAB * fAC * 0 + fAB * fBB * 0 + fAB * fBC * 0 +
    fAB * fCC * 0 + fAC * fAA * 0 + fAC * fAB * d0 / 2 + fAC * fAC * 0 + fAC * fBB * d0 +
    fAC * fBC * d0 / 2 + fAC * fCC * 0 + fBB * fAA * 0 + fBB * fAB * 0 + fBB * fAC * 0 +
    fBB * fBB * 0 + fBB * fBC * 0 + fBB * fCC * 0 + fBC * fAA * 0 + fBC * fAB * 1 / 4 +
    fBC * fAC * 0 + fBC * fBB * 1 / 2 + fBC * fBC * 1 / 4 + fBC * fCC * 0 + fCC * fAA * 0 +
    fCC * fAB * 1 / 2 + fCC * fAC * 0 + fCC * fBB * 1 + fCC * fBC * 1 / 2 + fCC * fCC * 0 + 0];
CCn = FullSimplify[fAA * fAA * 0 + fAA * fAB * 0 + fAA * fAC * 0 + fAA * fBB * 0 +
    fAA * fBC * 0 + fAA * fCC * 0 + fAB * fAA * 0 + fAB * fAB * 0 + fAB * fAC * 0 + fAB * fBB * 0 +
    fAB * fBC * 0 + fAB * fCC * 0 + fAC * fAA * 0 + fAC * fAB * 0 + fAC * fAC * d1 / 2 +
    fAC * fBB * 0 + fAC * fBC * d1 / 2 + fAC * fCC * d1 + fBB * fAA * 0 + fBB * fAB * 0 +
    fBB * fAC * 0 + fBB * fBB * 0 + fBB * fBC * 0 + fBB * fCC * 0 + fBC * fAA * 0 + fBC * fAB * 0 +
    fBC * fAC * 1 / 4 + fBC * fBB * 0 + fBC * fBC * 1 / 4 + fBC * fCC * 1 / 2 + fCC * fAA * 0 +
    fCC * fAB * 0 + fCC * fAC * 1 / 2 + fCC * fBB * 0 + fCC * fBC * 1 / 2 + fCC * fCC * 1 + 0];

(*Genotype frequencies after drive*)
fAA_drive = FullSimplify[AAn];
fAB_drive = FullSimplify[ABn + BAn];
fAC_drive = FullSimplify[ACn + CAn];
fBB_drive = FullSimplify[BBn];
fBC_drive = FullSimplify[BCn + CBn];
fCC_drive = FullSimplify[CCn];
(*check, do allele freqs sum to one?*)
FullSimplify[
    FullSimplify[fAA_drive + fAB_drive + fAC_drive + fBB_drive + fBC_drive + fCC_drive] /. HWE /. SUMTOONE]

```

## Selection

```

wAA = 1; wAC = wAB = 1 - hs; wBB = wBC = wCC = 1 - s;
W̄ = FullSimplify[
  (wAA fAADrive + wAB fABDrive + wAC fACDrive + wBB fBBDrive + wBC fBCDrive + wCC fCCDrive);
  (*Because the C allele arises on the B background we assume
  it has the same impact on individual fitness*)
FullSimplify[W̄ /. HWE /. SUMTOONE /. hs → 0]
1 + (fB + fC) (-2 d1 fC + 2 d0 fB (-1 + fB + fC) - (fB + fC) (fB + fC - 2 d1 fC)) s

fAAsel = fAADrive wAA / W̄;
fABsel = fABDrive wAB / W̄;
fACsel = fACDrive wAC / W̄;
fBBsel = fBBDrive wBB / W̄;
fBCsel = fBCDrive wBC / W̄;
fCCsel = fCCDrive wCC / W̄;
fAsel = FullSimplify[fAAsel + (fABsel + fACsel) / 2];
fBsel = FullSimplify[fBBsel + (fABsel + fBCsel) / 2];
fCsel = FullSimplify[fCCsel + (fACsel + fBCsel) / 2];
ΔfA = FullSimplify[fAsel - fA];
ΔfB = FullSimplify[fBsel - fB];
ΔfC = FullSimplify[fCsel - fC];

(*Check: do genotype freqs after selection sum to one?*)
FullSimplify[fAsel + fBsel + fCsel]
1

```

## Analysis

### Analysis - a standard driver [i.e. C is absent]

Note, we assume no deviation from Hardy - Weinberg for all analytical results, and therefore these answers are approximations. In the supplementary material we show that results of exact recursions are remarkably consistent from these approximate analytical solutions.

**Invasion of standard driver** - note the driver always invades when it has a recessive fitness cost. Reassuringly, this reproduces model 1.

```

invasionStandardDriver = Solve[
  (FullSimplify[(ΔfB /. GENOFREQS /. HWE /. SUMTOONE /. fC → 0) / fB] /. fB → 0) == 0, hs]
{{hs →  $\frac{-1 + 2 d0}{1 + 2 d0}$ }}

```

**Fixation of standard driver**



```
fixationStandardDriver = Solve[
  (FullSimplify[(ΔfB / fA /. GENOFREQS /. HWE /. SUMTOONE /. fC → 0]) /. fB → 1) == 0, s]
```

$$\left\{ \left\{ s \rightarrow \frac{1}{2} (-1 + 2 d0 + 3 hs - 2 d0 hs) \right\} \right\}$$

```
(*fixation of a standard recessive driver*)
```

```
fixationStandardDriver /. hs → 0
```

$$\left\{ \left\{ s \rightarrow \frac{1}{2} (-1 + 2 d0) \right\} \right\}$$

## Equilibrium

```
(*Equilibrium frequency of a standard driver]*)
```

```
eqfB = Solve[(ΔfB /. GENOFREQS /. HWE /. SUMTOONE /. fC → 0) == 0, fB][[4]]
```

$$\left\{ fB \rightarrow \left( 8 d0 hs - 4 d0 s + \frac{\sqrt{-4 (1 - 2 d0 + hs + 2 d0 hs) (-4 hs + 8 d0 hs + 2 s - 4 d0 s) + (-8 d0 hs + 4 d0 s)^2}}{2 (-4 hs + 8 d0 hs + 2 s - 4 d0 s)} \right) \right\}$$

```
(*Plot of equilibrium frequency of standard driver assuming full recessivity*)
```

```
ContourPlot[If[fB > 1, 1 / 0, If[fB < 0, 1 / 0, fB]] /. eqfB /. hs → 0, {d0, .5, 1},
  {s, 0, 1}, PlotLegends → BarLegend[Automatic, LegendLabel → "fB*"], PlotLabel →
  "Equilibrium frequency of a standard driver with a recessive fitness cost",
  FrameLabel → {"d0 (drive of the B allele)",
  "s (selection against driver, assuming recessive fitness cost)"}]
```

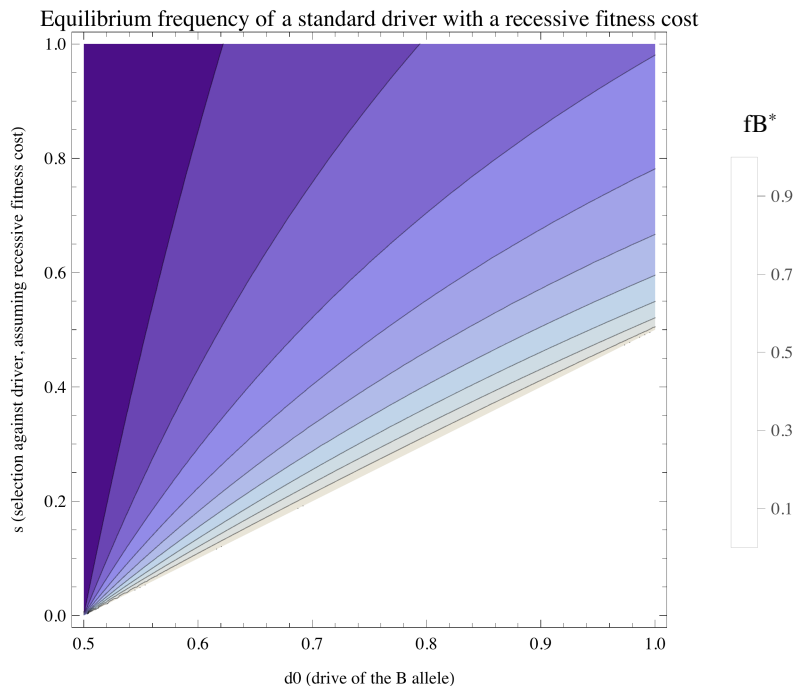

**Invasion of sperm acting drive modifier tightly linked with the**

## driver, and on the driving background

(\*change in frequency of the drive modifier when rare and when alleles at the drive locus are in drive-viability equilibrium, multiplied by  $\bar{W}/f_C$  [this value is always positive and will not influence the sign]\*)

```
wbarDeltaSpermDrive = FullSimplify[
  FullSimplify[ $\bar{W} \Delta f_C / (f_C) /. HWE /. SUMTOONE] /. f_C \rightarrow 0 /. eqfB /. minormod]
  \frac{1}{2 (1 - 2 d_0)^2 (2 h s - s)} (h s - s)
  \left( -1 - h s - \sqrt{2} \sqrt{(1 + h s - 2 d_0 (2 + d_0 (-2 + s))) (2 h s - s) + 2 d_0 (2 (-1 + d_0) (-1 + h s) + s)} \right) \epsilon$ 
```

(\*Plotting change this change in frequency when the sperm acting locus is rare, increases drive, and when the fitness cost of drive is fully recessive. NOTE: This sperm enhancer of drive cannot invade\*)

```
ContourPlot[
  If[fB > 1, 1 / 0, If[fB < 0.0001, 0, wbarDeltaSpermDrive]] /. eqfB /.  $\epsilon \rightarrow 0.01 /. hs \rightarrow 0,$ 
  {d0, 0.5, 1}, {s, 0, 1},
  PlotLegends  $\rightarrow$  BarLegend[Automatic, LegendLabel  $\rightarrow$  "scaled  $\Delta B^+$ "],
  PlotLabel  $\rightarrow$  "A sperm-acting drive enhancer (the  $B^+$  haplotype)
  cannot invade\n(assuming a recessive fitness cost of drive)",
  FrameLabel  $\rightarrow$  {"d0 (drive of the B allele)",
  "s (selection against driver, assuming recessive fitness cost)"}]
```

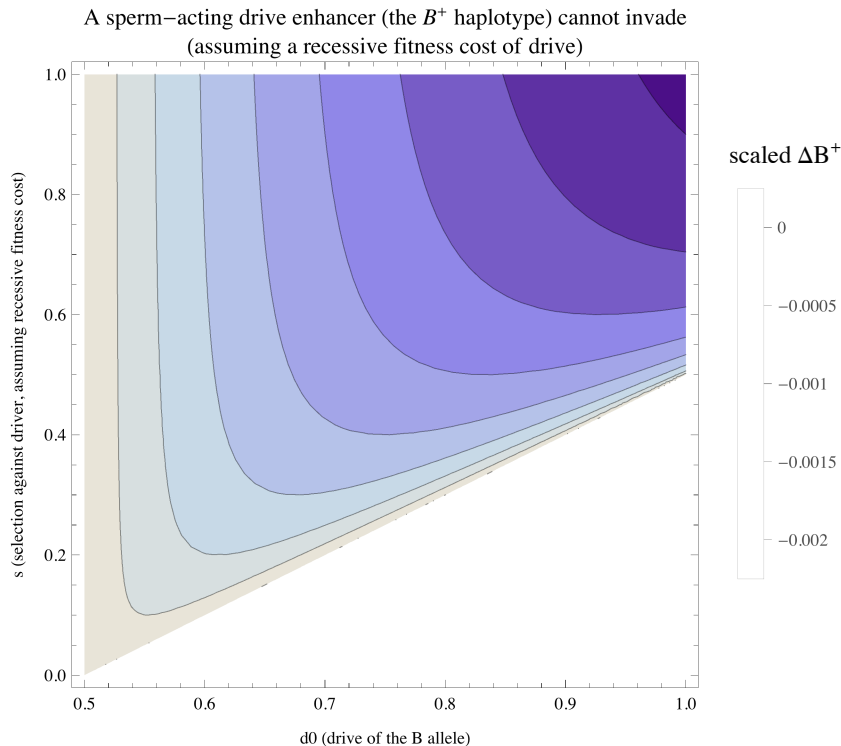

(\*Plotting change this change in frequency when the sperm acting locus is rare and decreases drive, and when the fitness cost of drive is fully recessive. NOTE: This sperm suppressor always invades\*)

```
ContourPlot[
  If[fB > 1, 1 / 0, If[fB < 0.0001, 0, wbarDeltaSpermDrive]] /. eqfB /. e -> -0.01 /. hs -> 0,
  {d0, 0.5, 1}, {s, 0, 1},
  PlotLegends -> BarLegend[Automatic, LegendLabel -> "scaled ΔB-"],
  PlotLabel -> "A sperm-acting drive suppressor (the B- haplotype)
    always invades\n(assuming a recessive fitness cost of drive)",
  FrameLabel -> {"d0 (drive of the B allele)",
    "s (selection against driver, assuming recessive fitness cost)"}]
```

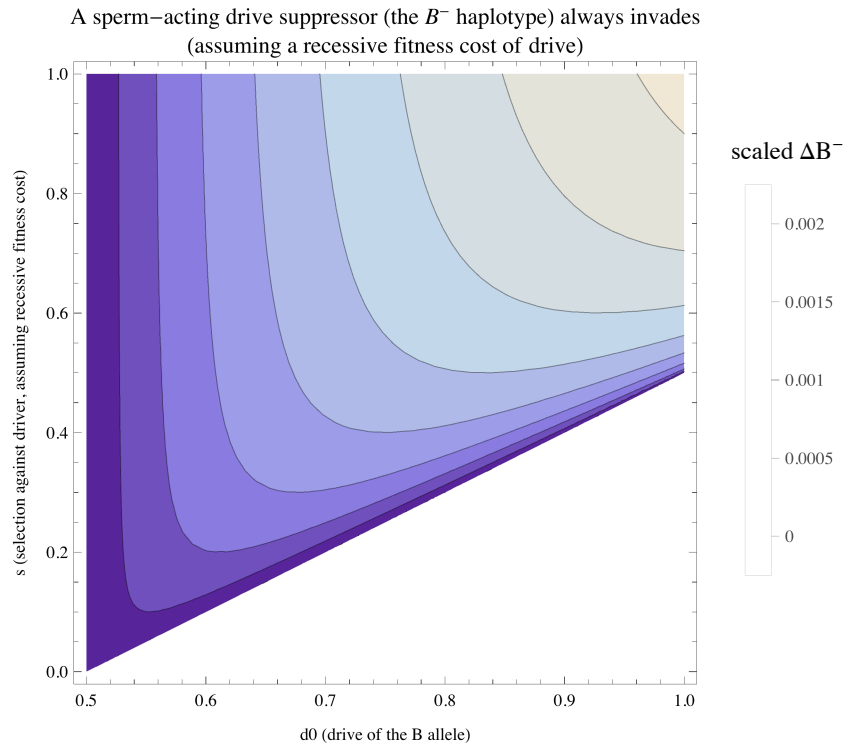

```
(*Plotting change this change in frequency when hte extent
of drive is mild [d0 = .6] and the sperm acting locus is rare
and increase drive. NOTE: This sperm enhancer never invades*)
ContourPlot[(If[fB > 1, 1 / 0, If[fB < 0.0000001, 0, wbarDeltaSpermDrive]] /. eqfB /.
  ε → 0.01 /. d0 → .6), {s, 0, 1}, {hs, 0, 1},
PlotLegends → BarLegend[Automatic, LegendLabel → "scaled ΔB+"], PlotLabel →
  "A sperm-acting drive enhancer (the B+ haplotype) cannot invade\n(assuming
  drive-selection equilibrium of a modest driver, d0 = .6)",
FrameLabel → {"s (selection against drive homozygotes)",
  "hs (selection against drive heterozygotes)"}]
```

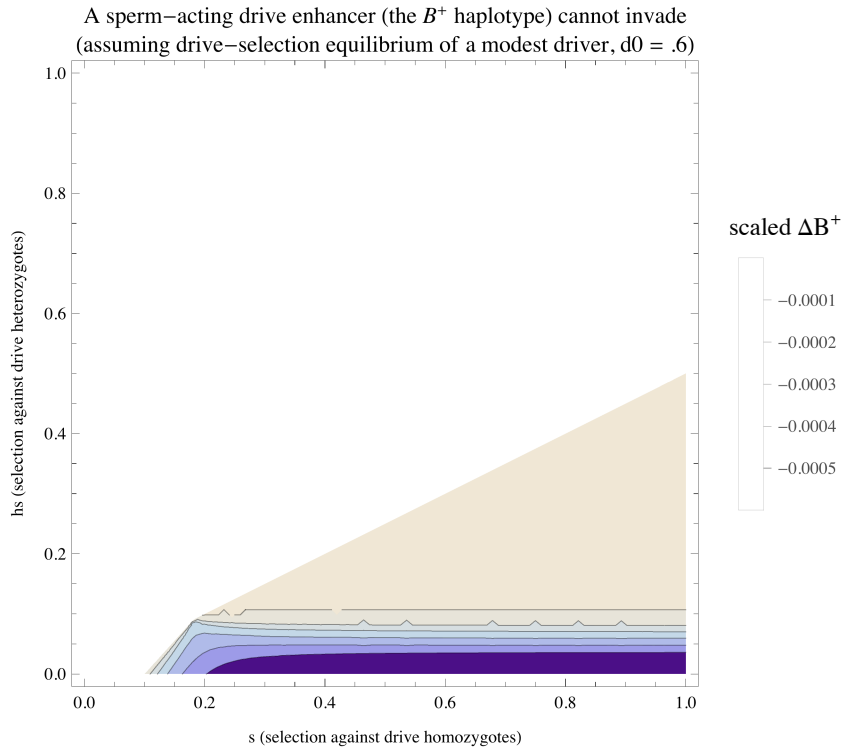

```
(*Plotting change this change in frequency when hte extent of
drive is mild [d0 = .98] and the sperm acting locus is rare and
increase drive. NOTE: This sperm enhancer never invades*)
ContourPlot[(If[fB > 1, 1 / 0, If[fB <= 0.001, -0.000000001, wbarDeltaSpermDrive]] /. eqfB /.
  ε → 0.01 /. d0 → .98), {s, 0, 1}, {hs, 0, 1},
PlotLegends → BarLegend[Automatic, LegendLabel → "scaled ΔB+"], PlotLabel →
  "A sperm-acting drive enhancer (the B+ haplotype) cannot invade\n(assuming
  drive-selection equilibrium of a strong driver, d0 = .98)",
FrameLabel → {"s (selection against drive homozygotes)",
  "hs (selection against drive heterozygotes)"}]
```

A sperm-acting drive enhancer (the  $B^+$  haplotype) cannot invade (assuming drive-selection equilibrium of a strong driver,  $d_0 = .98$ )

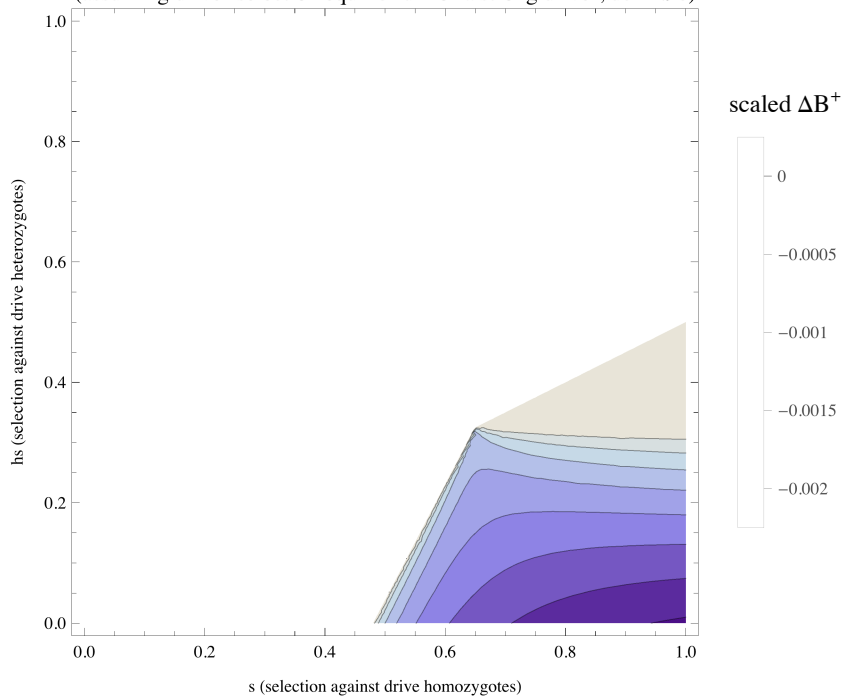

A sperm-acting drive enhancer (the  $B^+$  haplotype) cannot invade (assuming drive-selection equilibrium of a strong driver,  $d_0 = .98$ )

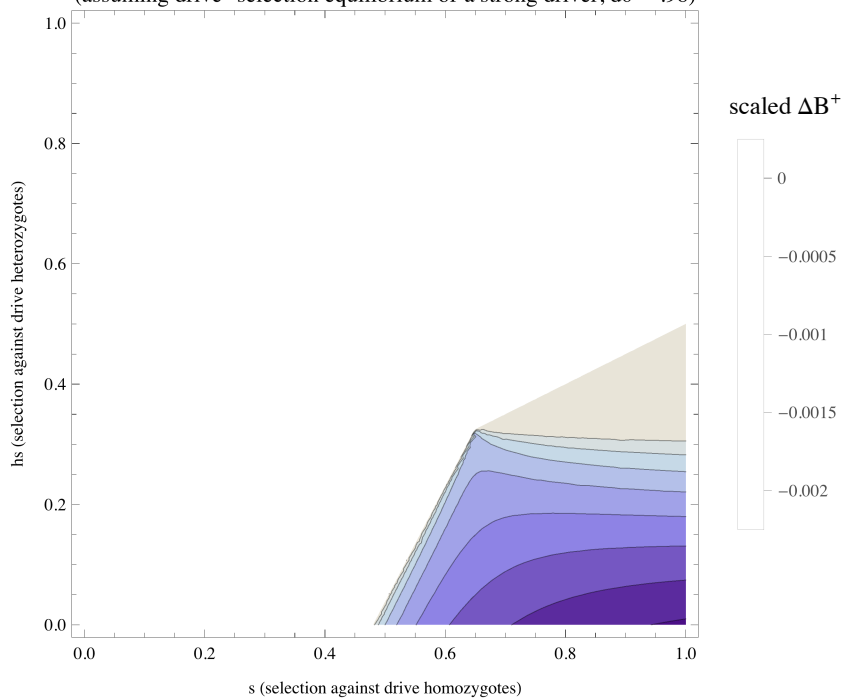

## Replacement of traditional driver by sperm acting drive suppressor tightly linked with the driver, and on the driving background

Equilibrium frequency of drive suppressor

```
eqfC = Solve[(FullSimplify[ΔfC /. HWE /. SUMTOONE /. minormod /. fB → 0]) == 0, fC][[4]];
```

(\*Equilibrium frequency of a linked, coupled, drive suppressor when the fitness costs of drive are recessive\*)

```
ContourPlot[If[fC < 1 && fC > 0, (fC), 1 / 0] /. eqfC /. hs → 0 /. ε → -.001,
  {d0, .5, 1}, {s, 0, 1}, PlotLegends → BarLegend[Automatic, LegendLabel → "fB- *"],
  PlotLabel → "Equilibrium freq. of sperm-acting drive suppressor (the B- haplotype)\n(assuming an initial complete driver, d0 = 1)", FrameLabel →
  {"d0 (drive of the B allele)", "s (selection against drive homozygotes)"}]
```

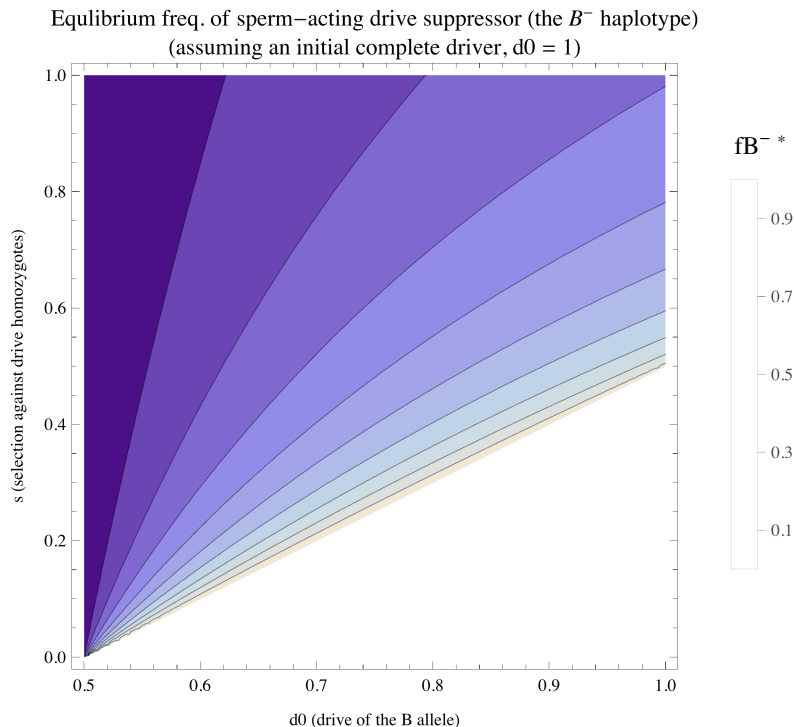

(\*Equilibrium frequency of a linked, coupled, drive suppressor when drive is complete\*)

```
ContourPlot[If[fC < 1 && fC > 0, (fC), 1 / 0] /. eqfC /. hs -> 0 /. ε -> -.001 /. d0 -> 1,
  {s, 0, 1}, {hs, 0, 1}, PlotLegends -> BarLegend[Automatic, LegendLabel -> "fB- *"],
  PlotLabel -> "Equilibrium freq. of a sperm-acting drive suppressor (the
    B- haplotype) \n(assuming an initial complete driver, d0 = 1)",
  FrameLabel -> {"s (selection against drive homozygotes)",
    "hs (selection against drive heterozygotes)"}]
```

Equilibrium freq. of a sperm-acting drive suppressor (the B<sup>-</sup> haplotype)  
 (assuming an initial complete driver, d0 = 1)

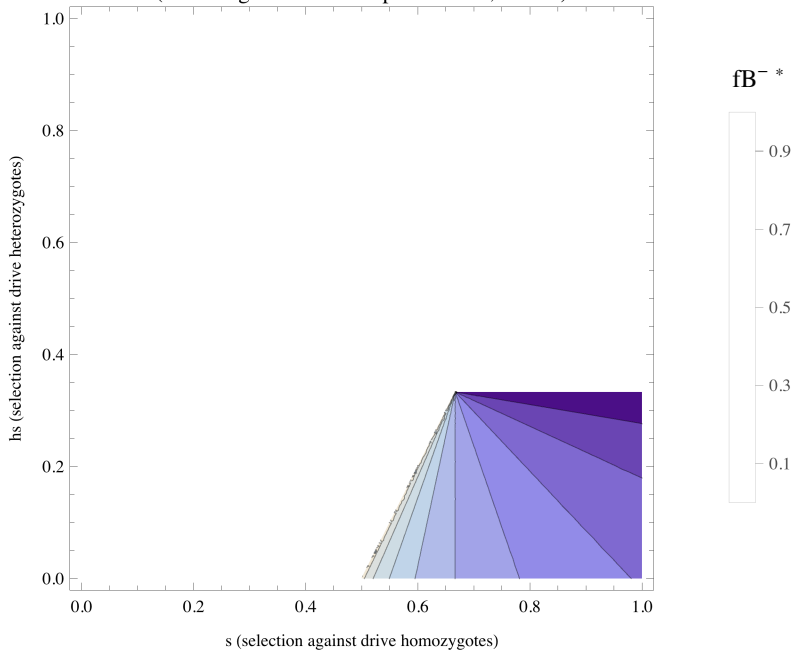

**Equilibrium frequency of drive/sperm acting suppressor haplotype is often less than that of the standard driver it replaces.**

(\*Difference in equilibrium frequency of the B- and B haplotypes\*)

```
ContourPlot[
  If[fC < 1 && fB < 1 && fC > 0 && fB > 0, (fC - fB), 1 / 0] /. eqfB /. eqfC /. hs -> 0 /.
  ε -> -.001, {d0, .5, 1}, {s, 0, 1},
  PlotLegends -> BarLegend[Automatic, LegendLabel -> "fB- * - fB*"], PlotLabel ->
  "Difference in equilibrium frequency of a drive suppressor (B- haplotype)\n and
  the driver it replaces (assuming a recessive cost of the drive allele)",
  FrameLabel -> {"d0 (drive of the B allele)",
  "s (selection against drive homozygotes)"}]
```

Difference in equilibrium frequency of a drive suppressor (B<sup>-</sup> haplotype) and the driver it replaces (assuming a recessive cost of the drive allele)

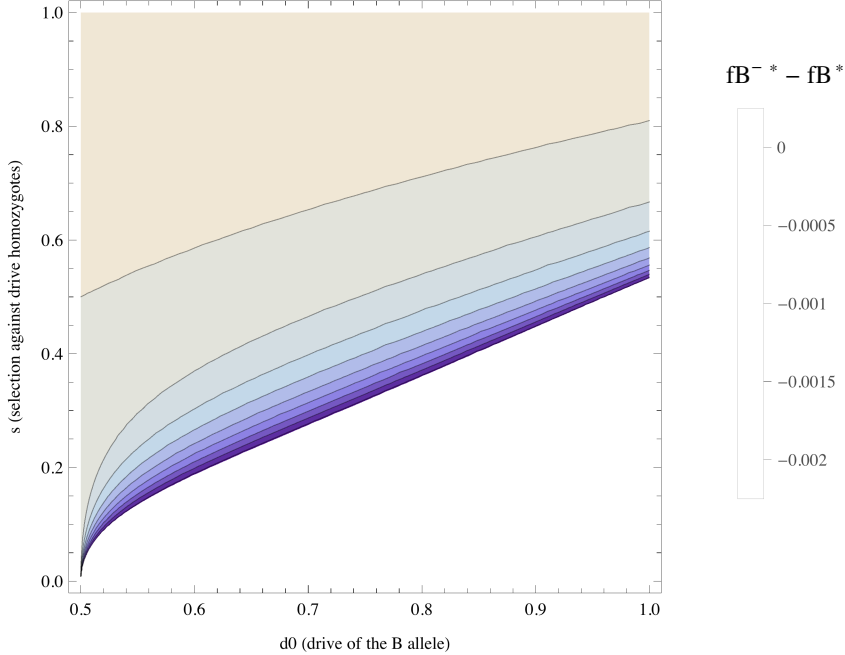



```
ContourPlot[
  If[fC < 1 && fB < 1 && fC > 0 && fB > 0, (fC - fB), 1 / 0] /. eqfB /. eqfC /. hs → (s / 4) /.
  ε → -.001, {d0, .5, 1}, {s, 0, 1},
  PlotLegends → BarLegend[Automatic, LegendLabel → "fB- * - fB*"], PlotLabel →
  "Difference in equilibrium frequency of a drive suppressor (B- haplotype)\n
  and the driver it replaces (assuming a heterozygote cost, hs = s/4)",
  FrameLabel → {"d0 (drive of the B allele)",
  "s (selection against drive homozygotes)"}]
```

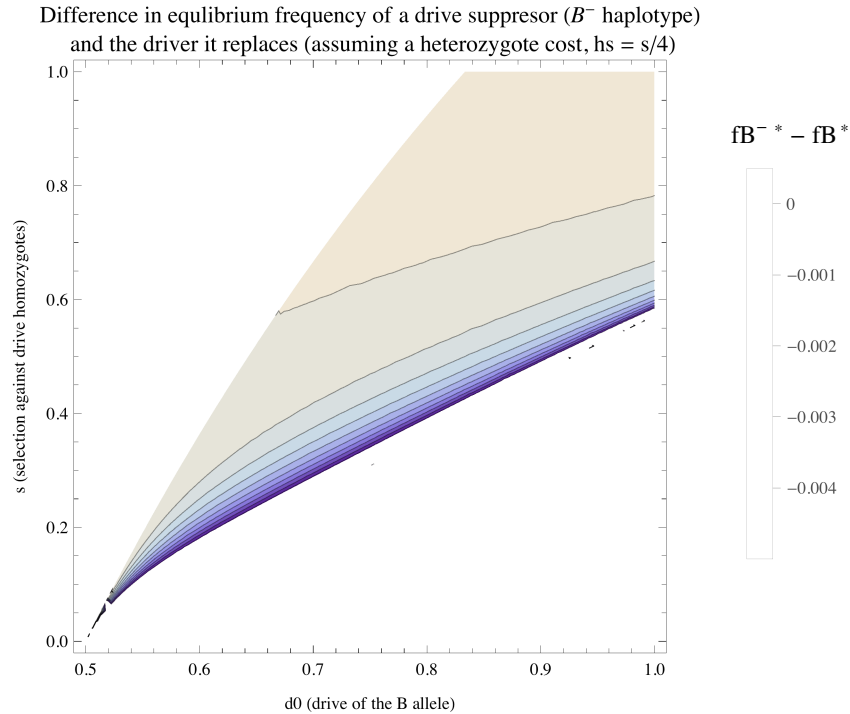

```
(*change in frequency of a rare traditional driver when the drive-
sperm suppressor haplotype and the ondriving hplotype
are at drive selection equilibrium, mutliplied by
Wbar/fC [this value is always positive and will not influence the sign]*)
wbarDeltaTradDrive = FullSimplify[
```

```
FullSimplify[ $\bar{W} \Delta f_B / (f_B)$  /. HWE /. SUMTOONE] /. fB → 0 /. eqfC /. minormod];
```

```
(*Plotting the change in frequency of a rare traditional
driving haplotype when the sperm drive suppressor is at drive
selection balance. ASSUMING the fitness cost of drive is fully
recessive. NOTE: This sperm enhancer of drive cannot invade*)
```

```
ContourPlot[
  If[fC > 1, 1 / 0, If[fC < 0.0001, 0, wbarDeltaTradDrive]] /. eqfC /.  $\epsilon \rightarrow -0.001$  /. hs  $\rightarrow 0$ ,
  {d0, 0.5, 1}, {s, 0, 1},
  PlotLegends  $\rightarrow$  BarLegend[Automatic, LegendLabel  $\rightarrow$  "scaled  $\Delta B$ "],
  PlotLabel  $\rightarrow$  "A fixed drive suppressor ( $B^-$  haplotype) cannot be displaced by \n a
    traditional driver (assuming a recessive fitness cost of drive)",
  FrameLabel  $\rightarrow$  {"d0 (drive of the B allele)",
    "s (selection against driver, assuming recessive fitness cost)"}]
```

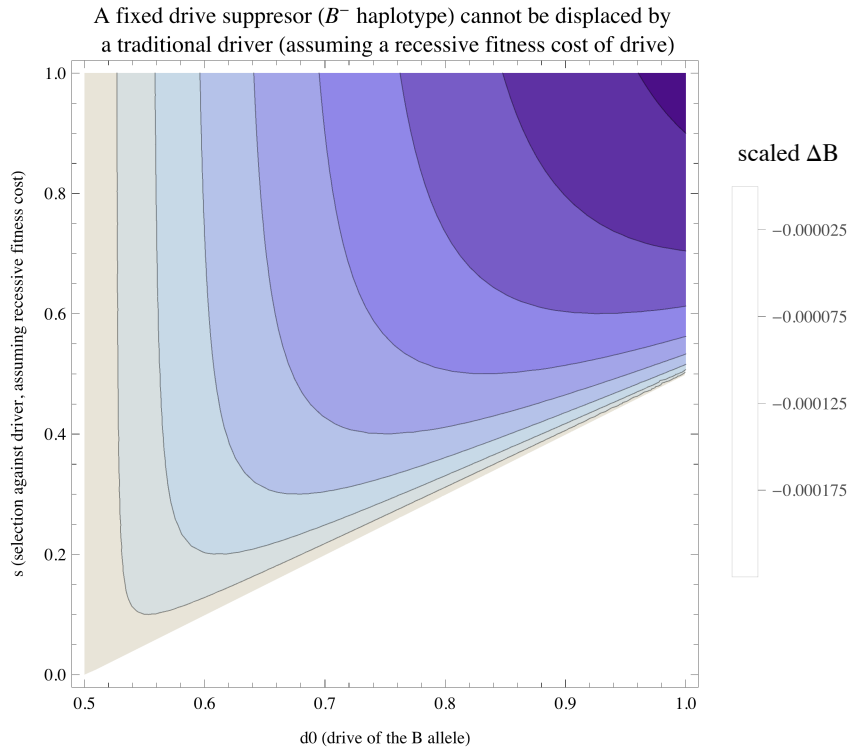

(\*Plotting the change in frequency of a rare traditional driving haplotype when the sperm drive suppressor is at drive selection balance. ASSUMING a fitness cost of drive in homozygotes ( $hs \rightarrow s/4$ ). NOTE: This sperm enhancer of drive cannot invade\*)

```

ContourPlot[
  If[fC > 1, 1 / 0, If[fC < 0.0001, 0, wbarDeltaTradDrive]] /. eqfC /.  $\epsilon \rightarrow -0.001$  /.
  hs  $\rightarrow$  s / 4, {d0, 0.5, 1}, {s, 0, 1},
  PlotLegends  $\rightarrow$  BarLegend[Automatic, LegendLabel  $\rightarrow$  "scaled  $\Delta B$ "],
  PlotLabel  $\rightarrow$  "A fixed sperm-acting drive suppressor cannot be displaced
    by a traditional \n(assuming a recessive fitness cost)",
  FrameLabel  $\rightarrow$  {"d0 (drive of the B allele)",
    "s (selection against driver, assuming recessive fitness cost)"}]

```

A fixed sperm-acting drive suppressor cannot be displaced by a traditional  
(assuming a recessive fitness cost of drive)

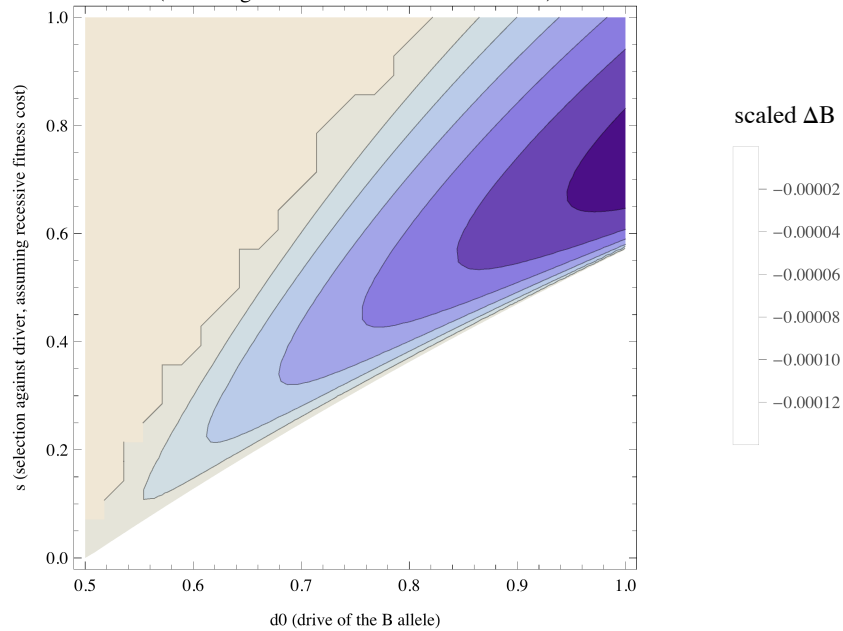

```
ContourPlot[
  If[fC > 1, 1 / 0, If[fC < 0.0001, 0, wbarDeltaTradDrive]] /. eqfC /.  $\epsilon \rightarrow -0.001$  /. d0  $\rightarrow 1$ ,
  {s, 0, 1}, {hs, 0, 1}, PlotLegends  $\rightarrow$  BarLegend[Automatic, LegendLabel  $\rightarrow$  "scaled  $\Delta B$ "],
  PlotLabel  $\rightarrow$  "A fixed sperm-acting drive suppressor cannot
    be displaced by a traditional \n(assuming perfect drive)",
  FrameLabel  $\rightarrow$  {"s (selection against drive homozygotes)",
    "hs (selection against drive heterozygotes)"}]
```

A fixed sperm-acting drive suppressor cannot be displaced by a traditional  
(assuming perfect drive)

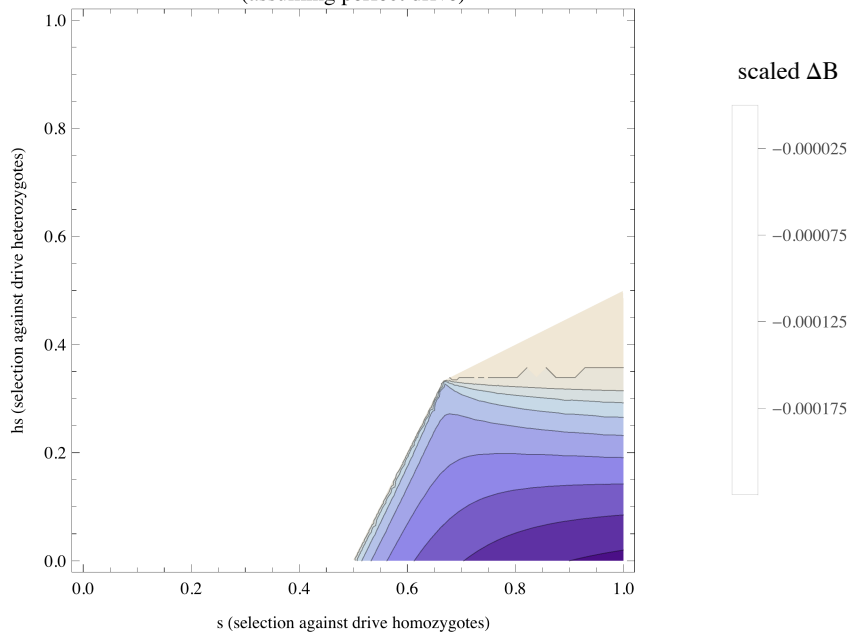

## Model 5. Female drive depends on sperm haplotype (two tightly linked, loci in repulsion phase)

We have one locus with two alleles, A (non-driving) and B (traditional driver), as well as a tightly linked locus where one allele modifies drive. This tightly-linked locus is on the A background. Assuming no recombination this functions as a third allele, C.

When C increases drive in heterozygous females it fertilizes, it is a drive enhancer (the A+ allele [not discussed in our ms]).

When C decreases drive in heterozygous females it fertilizes, it is a drive suppressor (the A- allele in our ms).

## Setup

```

ClearAll["Global`*"]
fA = .
fAA = .
fAB = .
fAC = .
fBB = .
fBC = .
fCC = .
minormod = {d1 -> d0 + ε}
(*assuming the sperm acting modifier additively increases drive by epsilon*)
SUMTOONE = {fA -> 1 - (fB + fC)};
HWE =
  {fAA -> fA^2, fAB -> 2 fA fB, fAC -> 2 fA fC, fBB -> fB^2, fBC -> 2 fB fC, fCC -> fC^2};
GENOFREQS = {fA -> fAA + fAB / 2 + fAC / 2,
  fB -> fBB + fAB / 2 + fBC / 2, fC -> fCC + fBC / 2 + fFC / 2};

```

## Drive

(\*Here we caculate all genotypes after drive. For book-keeping purposes we distinguish between reciprocal homozygotes, but remove this distinction belowsun them below\*)

```

AAAn =
  FullSimplify[fAA * fAA * 1 + fAA * fAB * 1 / 2 + fAA * fAC * 1 / 2 + fAA * fBB * 0 + fAA * fBC * 0 +
  fAA * fCC * 0 + fAB * fAA * (1 - d0) + fAB * fAB * (1 - d0) / 2 + fAB * fAC * (1 - d0) / 2 +
  fAB * fBB * 0 + fAB * fBC * 0 + fAB * fCC * 0 + fAC * fAA * 1 / 2 + fAC * fAB * 1 / 4 +
  fAC * fAC * 1 / 4 + fAC * fBB * 0 + fAC * fBC * 0 + fAC * fCC * 0 + fBB * fAA * 0 + fBB * fAB * 0 +
  fBB * fAC * 0 + fBB * fBB * 0 + fBB * fBC * 0 + fBB * fCC * 0 + fBC * fAA * 0 + fBC * fAB * 0 +
  fBC * fAC * 0 + fBC * fBB * 0 + fBC * fBC * 0 + fBC * fCC * 0 + fCC * fAA * 0 +
  fCC * fAB * 0 + fCC * fAC * 0 + fCC * fBB * 0 + fCC * fBC * 0 + fCC * fCC * 0 + 0];
ABn = FullSimplify[fAA * fAA * 0 + fAA * fAB * 1 / 2 + fAA * fAC * 0 + fAA * fBB * 1 +
  fAA * fBC * 1 / 2 + fAA * fCC * 0 + fAB * fAA * 0 + fAB * fAB * (1 - d0) / 2 + fAB * fAC * 0 +
  fAB * fBB * (1 - d0) + fAB * fBC * (1 - d0) / 2 + fAB * fCC * 0 + fAC * fAA * 0 + fAC * fAB * 1 / 4 +
  fAC * fAC * 0 + fAC * fBB * 1 / 2 + fAC * fBC * 1 / 4 + fAC * fCC * 0 + fBB * fAA * 0 +
  fBB * fAB * 0 + fBB * fAC * 0 + fBB * fBB * 0 + fBB * fBC * 0 + fBB * fCC * 0 + fBC * fAA * 0 +
  fBC * fAB * 0 + fBC * fAC * 0 + fBC * fBB * 0 + fBC * fBC * 0 + fBC * fCC * 0 + fCC * fAA * 0 +
  fCC * fAB * 0 + fCC * fAC * 0 + fCC * fBB * 0 + fCC * fBC * 0 + fCC * fCC * 0 + 0];
ACn = FullSimplify[fAA * fAA * 0 + fAA * fAB * 0 + fAA * fAC * 1 / 2 + fAA * fBB * 0 +
  fAA * fBC * 1 / 2 + fAA * fCC * 1 + fAB * fAA * 0 + fAB * fAB * 0 + fAB * fAC * (1 - d1) / 2 +
  fAB * fBB * 0 + fAB * fBC * (1 - d1) / 2 + fAB * fCC * (1 - d1) + fAC * fAA * 0 + fAC * fAB * 0 +
  fAC * fAC * 1 / 4 + fAC * fBB * 0 + fAC * fBC * 1 / 4 + fAC * fCC * 1 / 2 + fBB * fAA * 0 +
  fBB * fAB * 0 + fBB * fAC * 0 + fBB * fBB * 0 + fBB * fBC * 0 + fBB * fCC * 0 + fBC * fAA * 0 +
  fBC * fAB * 0 + fBC * fAC * 0 + fBC * fBB * 0 + fBC * fBC * 0 + fBC * fCC * 0 + fCC * fAA * 0 +
  fCC * fAB * 0 + fCC * fAC * 0 + fCC * fBB * 0 + fCC * fBC * 0 + fCC * fCC * 0 + 0];
BAAn = FullSimplify[fAA * fAA * 0 + fAA * fAB * 0 + fAA * fAC * 0 + fAA * fBB * 0 + fAA * fBC * 0 +
  fAA * fCC * 0 + fAB * fAA * d0 + fAB * fAB * d0 / 2 + fAB * fAC * d0 / 2 + fAB * fBB * 0 +
  fAB * fBC * 0 + fAB * fCC * 0 + fAC * fAA * 0 + fAC * fAB * 0 + fAC * fAC * 0 + fAC * fBB * 0 +
  fAC * fBC * 0 + fAC * fCC * 0 + fBB * fAA * 1 + fBB * fAB * 1 / 2 + fBB * fAC * 1 / 2 +

```

```

fBB * fBB * 0 + fBB * fBC * 0 + fBB * fCC * 0 + fBC * fAA * d0 + fBC * fAB * d0 / 2 +
fBC * fAC * (d0) / 2 + fBC * fBB * 0 + fBC * fBC * 0 + fBC * fCC * 0 + fCC * fAA * 0 +
fCC * fAB * 0 + fCC * fAC * 0 + fCC * fBB * 0 + fCC * fBC * 0 + fCC * fCC * 0 + 0];
BBn = FullSimplify[fAA * fAA * 0 + fAA * fAB * 0 + fAA * fAC * 0 + fAA * fBB * 0 + fAA * fBC * 0 +
fAA * fCC * 0 + fAB * fAA * 0 + fAB * fAB * d0 / 2 + fAB * fAC * 0 + fAB * fBB * d0 +
fAB * fBC * d0 / 2 + fAB * fCC * 0 + fAC * fAA * 0 + fAC * fAB * 0 + fAC * fAC * 0 +
fAC * fBB * 0 + fAC * fBC * 0 + fAC * fCC * 0 + fBB * fAA * 0 + fBB * fAB * 1 / 2 + fBB * fAC * 0 +
fBB * fBB * 1 + fBB * fBC * 1 / 2 + fBB * fCC * 0 + fBC * fAA * 0 + fBC * fAB * d0 / 2 +
fBC * fAC * 0 + fBC * fBB * d0 + fBC * fBC * (d0) / 2 + fBC * fCC * 0 + fCC * fAA * 0 +
fCC * fAB * 0 + fCC * fAC * 0 + fCC * fBB * 0 + fCC * fBC * 0 + fCC * fCC * 0 + 0];
BCn = FullSimplify[fAA * fAA * 0 + fAA * fAB * 0 + fAA * fAC * 0 + fAA * fBB * 0 +
fAA * fBC * 0 + fAA * fCC * 0 + fAB * fAA * 0 + fAB * fAB * 0 + fAB * fAC * (d1) / 2 +
fAB * fBB * 0 + fAB * fBC * (d1) / 2 + fAB * fCC * d1 + fAC * fAA * 0 + fAC * fAB * 0 +
fAC * fAC * 0 + fAC * fBB * 0 + fAC * fBC * 0 + fAC * fCC * 0 + fBB * fAA * 0 + fBB * fAB * 0 +
fBB * fAC * 1 / 2 + fBB * fBB * 0 + fBB * fBC * 1 / 2 + fBB * fCC * 1 + fBC * fAA * 0 +
fBC * fAB * 0 + fBC * fAC * (d1) / 2 + fBC * fBB * 0 + fBC * fBC * (d1) / 2 + fBC * fCC * d1 +
fCC * fAA * 0 + fCC * fAB * 0 + fCC * fAC * 0 + fCC * fBB * 0 + fCC * fBC * 0 + fCC * fCC * 0 + 0];
CAN = FullSimplify[fAA * fAA * 0 + fAA * fAB * 0 + fAA * fAC * 0 + fAA * fBB * 0 +
fAA * fBC * 0 + fAA * fCC * 0 + fAB * fAA * 0 + fAB * fAB * 0 + fAB * fAC * 0 + fAB * fBB * 0 +
fAB * fBC * 0 + fAB * fCC * 0 + fAC * fAA * 1 / 2 + fAC * fAB * 1 / 4 + fAC * fAC * 1 / 4 +
fAC * fBB * 0 + fAC * fBC * 0 + fAC * fCC * 0 + fBB * fAA * 0 + fBB * fAB * 0 + fBB * fAC * 0 +
fBB * fBB * 0 + fBB * fBC * 0 + fBB * fCC * 0 + fBC * fAA * (1 - d0) + fBC * fAB * (1 - d0) / 2 +
fBC * fAC * (1 - d0) / 2 + fBC * fBB * 0 + fBC * fBC * 0 + fBC * fCC * 0 + fCC * fAA * 1 +
fCC * fAB * 1 / 2 + fCC * fAC * 1 / 2 + fCC * fBB * 0 + fCC * fBC * 0 + fCC * fCC * 0 + 0];
CBn = FullSimplify[fAA * fAA * 0 + fAA * fAB * 0 + fAA * fAC * 0 + fAA * fBB * 0 + fAA * fBC * 0 +
fAA * fCC * 0 + fAB * fAA * 0 + fAB * fAB * 0 + fAB * fAC * 0 + fAB * fBB * 0 + fAB * fBC * 0 +
fAB * fCC * 0 + fAC * fAA * 0 + fAC * fAB * 1 / 4 + fAC * fAC * 0 + fAC * fBB * 1 / 2 +
fAC * fBC * 1 / 4 + fAC * fCC * 0 + fBB * fAA * 0 + fBB * fAB * 0 + fBB * fAC * 0 +
fBB * fBB * 0 + fBB * fBC * 0 + fBB * fCC * 0 + fBC * fAA * 0 + fBC * fAB * (1 - d0) / 2 +
fBC * fAC * 0 + fBC * fBB * (1 - d0) + fBC * fBC * (1 - d0) / 2 + fBC * fCC * 0 + fCC * fAA * 0 +
fCC * fAB * 1 / 2 + fCC * fAC * 0 + fCC * fBB * 1 + fCC * fBC * 1 / 2 + fCC * fCC * 0 + 0];
CCn = FullSimplify[fAA * fAA * 0 + fAA * fAB * 0 + fAA * fAC * 0 + fAA * fBB * 0 + fAA * fBC * 0 +
fAA * fCC * 0 + fAB * fAA * 0 + fAB * fAB * 0 + fAB * fAC * 0 + fAB * fBB * 0 + fAB * fBC * 0 +
fAB * fCC * 0 + fAC * fAA * 0 + fAC * fAB * 0 + fAC * fAC * 1 / 4 + fAC * fBB * 0 + fAC * fBC * 1 / 4 +
fAC * fCC * 1 / 2 + fBB * fAA * 0 + fBB * fAB * 0 + fBB * fAC * 0 + fBB * fBB * 0 +
fBB * fBC * 0 + fBB * fCC * 0 + fBC * fAA * 0 + fBC * fAB * 0 + fBC * fAC * (1 - d1) / 2 +
fBC * fBB * 0 + fBC * fBC * (1 - d1) / 2 + fBC * fCC * (1 - d1) + fCC * fAA * 0 +
fCC * fAB * 0 + fCC * fAC * 1 / 2 + fCC * fBB * 0 + fCC * fBC * 1 / 2 + fCC * fCC * 1 + 0];

(*Genotype frequencies after drive*)
fAA_drive = FullSimplify[AAn];
fAB_drive = FullSimplify[ABn + BAn];
fAC_drive = FullSimplify[ACn + CAn];
fBB_drive = FullSimplify[BBn];
fBC_drive = FullSimplify[BCn + CBn];
fCC_drive = FullSimplify[CCn];
(*check, do allele freqs sum to one?*)
FullSimplify[
  FullSimplify[fAA_drive + fAB_drive + fAC_drive + fBB_drive + fBC_drive + fCC_drive] /. HWE /. SUMTOONE]

```

1

## Selection

```

wAA = wAC = wCC = 1; wAB = wBC = 1 - hs; wBB = 1 - s;
W̄ = FullSimplify[
  (wAA fAADrive + wAB fABDrive + wAC fACDrive + wBB fBBDrive + wBC fBCDrive + wCC fCCDrive)]];
(*Because the C allele arises on the B background we assume
it has the same impact on individual fitness*)
FullSimplify[W̄ /. HWE /. SUMTOONE /. hs → 0]
1 + (2 d0 (-1 + fB) - fB) fB2 s

fAAsel = fAADrive wAA / W̄;
fABsel = fABDrive wAB / W̄;
fACsel = fACDrive wAC / W̄;
fBBsel = fBBDrive wBB / W̄;
fBCsel = fBCDrive wBC / W̄;
fCCsel = fCCDrive wCC / W̄;
fAsel = FullSimplify[fAAsel + (fABsel + fACsel) / 2];
fBsel = FullSimplify[fBBsel + (fABsel + fBCsel) / 2];
fCsel = FullSimplify[fCCsel + (fACsel + fBCsel) / 2];
ΔfA = FullSimplify[fAsel - fA];
ΔfB = FullSimplify[fBsel - fB];
ΔfC = FullSimplify[fCsel - fC];

(*Check: do genotype freqs after selection sum to one?*)
FullSimplify[fAsel + fBsel + fCsel]
1

FullSimplify[W̄ fACsel /. HWE /. SUMTOONE]
2 (-1 + (-1 + d0 + d1) fB) fC (-1 + fB + fC)

```

---

## Analysis

### Analysis - a standard driver [i.e. C is absent]

THIS IS THE SAME AS ABOVE, AND WE RENETER IT SIMPLY TO LOAD RESULTS INTO MEMORY. PLOTS ARE NOT RECREATED

```

invasionStandardDriver = Solve[
  (FullSimplify[(ΔfB /. GENOFREQS /. HWE /. SUMTOONE /. fC → 0) / fB] /. fB → 0) == 0,
  hs];
fixationStandardDriver = Solve[
  (FullSimplify[(ΔfB / fA /. GENOFREQS /. HWE /. SUMTOONE /. fC → 0)] /. fB → 1) == 0,
  s];
eqfB = Solve[(ΔfB /. GENOFREQS /. HWE /. SUMTOONE /. fC → 0) == 0, fB][[4]];

```

## Invasion of sperm acting drive modifier tightly linked with the driver, on the non-driving background

(\*change in frequency of the drive modifier when rare and when alleles at the drive locus are in drive-viability equilibrium, multiplied by  $\bar{w}/fC^2$  [this value is always positive and will not influence the sign]\*)

$$\text{wbarDeltaSpermDriveRecessive} = \text{FullSimplify}\left[\frac{\left(\text{FullSimplify}\left[\bar{w}\Delta fC / (fC^2) /. \text{HWE} /. \text{SUMTOONE} /. \text{eqfB} /. \text{hs} \rightarrow 0\right]\right) /. \text{minormod}}{\left(-2 d0 s + \sqrt{2} \sqrt{(-1 + 2 d0 (2 + d0 (-2 + s))) s}\right) \epsilon} \right]$$

$$\frac{\left(-2 d0 s + \sqrt{2} \sqrt{(-1 + 2 d0 (2 + d0 (-2 + s))) s}\right) \epsilon}{2 (-1 + 2 d0) s}$$

```
ContourPlot[
  If[fB > 1, 1 / 0, If[fB < 0.0001, 0, wbarDeltaSpermDriveRecessive]] /. eqfB /.
  ε → -0.01 /. hs → 0, {d0, 0.5, 1}, {s, 0, 1},
  PlotLegends → BarLegend[Automatic, LegendLabel → "scaled ΔA⁻"],
  PlotLabel → "A sperm-acting drive suppressor linked\n to the nondriving allele\n (the A⁻ haplotype)\n invades when the cost of drive is fully recessive",
  FrameLabel → {"d0 (drive of the B allele)",
    "s (selection against driver, assuming recessive fitness cost)"}]
```

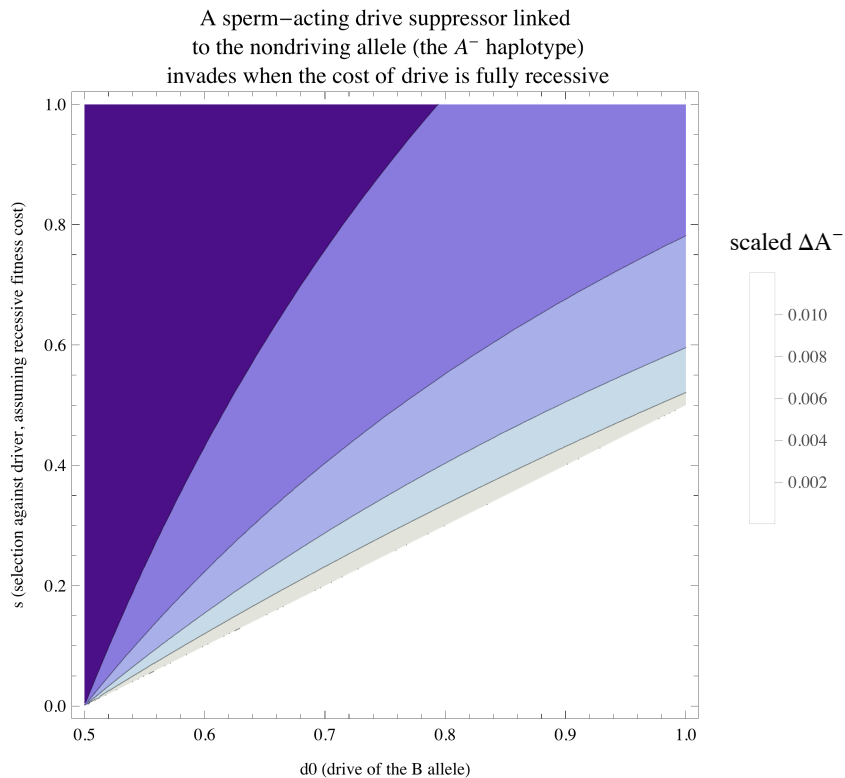

(\*change in frequency of the drive modifier when rare and when alleles at the drive locus are in drive-viability equilibrium, multiplied by  $\bar{w}/fC$  [this value is always positive and will not influence the sign]\*)



```
wbarDeltaSpermDrive = FullSimplify[
  FullSimplify[ $\bar{w} \Delta f_C / (f_C) /. HWE /. SUMTOONE] /. f_C \to 0 /. eqfB /. minormod]
  - \frac{1}{2 (1 - 2 d_0)^2 (2 h_s - s)} h_s (-1 - h_s - \sqrt{2} \sqrt{(1 + h_s - 2 d_0 (2 + d_0 (-2 + s))) (2 h_s - s) + 2 d_0 (2 (-1 + d_0) (-1 + h_s) + s)}) \epsilon$ 
```

(\*Plotting change this change in frequency when the sperm acting locus is rare, increases drive, and when the fitness cost of drive is fully recessive. NOTE: This sperm enhancer of drive cannot invade\*)

```
ContourPlot[
  If[fB > 1, 1 / 0, If[fB < 0.0001, 0, wbarDeltaSpermDrive]] /. eqfB /.  $\epsilon \to -0.01$  /.
  hs  $\to s / 4$ , {d0, 0.5, 1}, {s, 0, 1},
  PlotLegends  $\to$  BarLegend[Automatic, LegendLabel  $\to$  "scaled  $\Delta A^-$ "], PlotLabel  $\to$ 
  "Invasion of a sperm-acting drive suppressor linked to the nondriving\n allele
  (the A- haplotype), assuming the cost of drive is not fully recessive.",
  FrameLabel  $\to$  {"d0 (drive of the B allele)",
  "s (selection against driver, assuming het fitness cost,  $h_s = \frac{s}{4}$ ")}]
```

Invasion of a sperm-acting drive suppressor linked to the nondriving allele (the A<sup>-</sup> haplotype), assuming the cost of drive is not fully recessive.

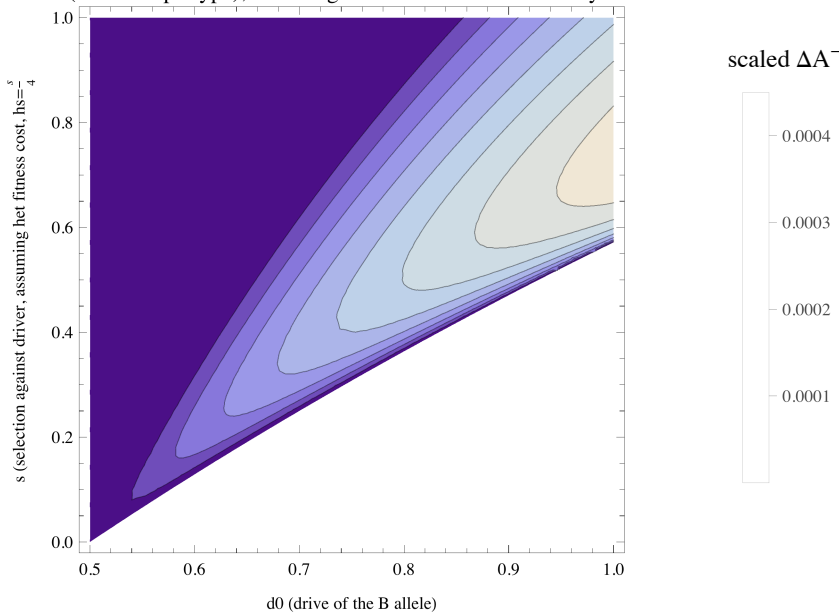

## Model 6. Female drive depends on sperm genotype at an unlinked locus

In addition to our one locus with two alleles, A (non-driving) and B (traditional driver), we have a second locus with loci, E and F. We are concerned with the invasion and fixation of the F allele, which acts to modify drive when it fertilizes a heterozygote. Drive of the B allele is  $d_0$ , but changes to  $d_1$  when fertilized by an 'F' bearing sperm

### Setup

```
In[196]:= fA = .; fB = .; fE = .; fF = .;
fAE = fA fE + D;
fAF = fA fF - D;
fBE = fB fE - D;
fBF = fB fF + D;
randomHaps = {fAAEE → FullSimplify[fAE fAE],
  fABEE → FullSimplify[2 fAE fBE], fBBEE → FullSimplify[fBE fBE],
  fAAEF → FullSimplify[2 fAE fAF], fABEF → FullSimplify[2 (fAE fBF + fAF fBE)],
  fBBEF → FullSimplify[2 fBE fBF], fAAFF → FullSimplify[fAF fAF],
  fABFF → FullSimplify[2 fAF fBF], fBBFF → FullSimplify[fBF fBF]};
sum2one = {fA → 1 - fB, fE → 1 - fF}
minormod = {d1 → d0 + ε}
(*assuming the sperm acting modifier additively increases drive by epsilon*);
Out[202]:= {fA → 1 - fB, fE → 1 - fF}
```

### Drive

```
fAAEEdrive = FullSimplify[
  fAAEE * fAAEE * 1 + fAAEE * fABEE * 1 / 2 + fAAEE * fBBEE * 0 + fAAEE * fAAEF * 1 / 2 +
  fAAEE * fABEF * 1 / 4 + fAAEE * fBBEF * 0 + fAAEE * fAAFF * 0 + fAAEE * fABFF * 0 +
  fAAEE * fBBFF * 0 + fABEE * fAAEE * (1 - d0) + fABEE * fABEE * (1 - d0) / 2 + fABEE * fBBEE * 0 +
  fABEE * fAAEF * (1 - d0) / 2 + fABEE * fABEF * (1 - d0) / 4 + fABEE * fBBEF * 0 +
  fABEE * fAAFF * 0 + fABEE * fABFF * 0 + fABEE * fBBFF * 0 + fBBEE * fAAEE * 0 +
  fBBEE * fABEE * 0 + fBBEE * fBBEE * 0 + fBBEE * fAAEF * 0 + fBBEE * fABEF * 0 +
  fBBEE * fBBEF * 0 + fBBEE * fAAFF * 0 + fBBEE * fABFF * 0 + fBBEE * fBBFF * 0 +
  fAAEF * fAAEE * 1 / 2 + fAAEF * fABEE * 1 / 4 + fAAEF * fBBEE * 0 + fAAEF * fAAEF * 1 / 4 +
  fAAEF * fABEF * 1 / 8 + fAAEF * fBBEF * 0 + fAAEF * fAAFF * 0 + fAAEF * fABFF * 0 +
  fAAEF * fBBFF * 0 + fABEF * fAAEE * (1 - d0) / 2 + fABEF * fABEE * (1 - d0) / 4 +
```

```

fABEF * fBBEE * 0 + fABEF * fAAEF * (1 - d0) / 4 + fABEF * fABEF * (1 - d0) / 8 +
fABEF * fBBEF * 0 + fABEF * fAAFF * 0 + fABEF * fABFF * 0 + fABEF * fBBFF * 0 +
fBBEF * fAAEE * 0 + fBBEF * fABEE * 0 + fBBEF * fBBEE * 0 + fBBEF * fAAEF * 0 +
fBBEF * fABEF * 0 + fBBEF * fBBEF * 0 + fBBEF * fAAFF * 0 + fBBEF * fABFF * 0 +
fBBEF * fBBFF * 0 + fAAFF * fAAEE * 0 + fAAFF * fABEE * 0 + fAAFF * fBBEE * 0 +
fAAFF * fAAEF * 0 + fAAFF * fABEF * 0 + fAAFF * fBBEF * 0 + fAAFF * fAAFF * 0 +
fAAFF * fABFF * 0 + fAAFF * fBBFF * 0 + fABFF * fAAEE * 0 + fABFF * fABEE * 0 +
fABFF * fBBEE * 0 + fABFF * fAAEF * 0 + fABFF * fABEF * 0 + fABFF * fBBEF * 0 +
fABFF * fAAFF * 0 + fABFF * fABFF * 0 + fABFF * fBBFF * 0 + fBBFF * fAAEE * 0 +
fBBFF * fABEE * 0 + fBBFF * fBBEE * 0 + fBBFF * fAAEF * 0 + fBBFF * fABEF * 0 +
fBBFF * fBBEF * 0 + fBBFF * fAAFF * 0 + fBBFF * fABFF * 0 + fBBFF * fBBFF * 0 + 0]
fBEE_drive = FullSimplify[fAAEE * fAAEE * 0 + fAAEE * fABEE * 1 / 2 + fAAEE * fBBEE * 1 +
fAAEE * fAAEF * 0 + fAAEE * fABEF * 1 / 4 + fAAEE * fBBEF * 1 / 2 + fAAEE * fAAFF * 0 +
fAAEE * fABFF * 0 + fAAEE * fBBFF * 0 + fABEE * fAAEE * d0 + fABEE * fABEE * 1 / 2 +
fABEE * fBBEE * (1 - d0) + fABEE * fAAEF * d0 / 2 + fABEE * fABEF * 1 / 4 +
fABEE * fBBEF * (1 - d0) / 2 + fABEE * fAAFF * 0 + fABEE * fABFF * 0 + fABEE * fBBFF * 0 +
fBBEE * fAAEE * 1 + fBBEE * fABEE * 1 / 2 + fBBEE * fBBEE * 0 + fBBEE * fAAEF * 1 / 2 +
fBBEE * fABEF * 1 / 4 + fBBEE * fBBEF * 0 + fBBEE * fAAFF * 0 + fBBEE * fABFF * 0 +
fBBEE * fBBFF * 0 + fAAEF * fAAEE * 0 + fAAEF * fABEE * 1 / 4 + fAAEF * fBBEE * 1 / 2 +
fAAEF * fAAEF * 0 + fAAEF * fABEF * 1 / 8 + fAAEF * fBBEF * 1 / 4 + fAAEF * fAAFF * 0 +
fAAEF * fABFF * 0 + fAAEF * fBBFF * 0 + fABEF * fAAEE * d0 / 2 + fABEF * fABEE * 1 / 4 +
fABEF * fBBEE * (1 - d0) / 2 + fABEF * fAAEF * d0 / 4 + fABEF * fABEF * 1 / 8 +
fABEF * fBBEF * (1 - d0) / 4 + fABEF * fAAFF * 0 + fABEF * fABFF * 0 + fABEF * fBBFF * 0 +
fBBEF * fAAEE * 1 / 2 + fBBEF * fABEE * 1 / 4 + fBBEF * fBBEE * 0 + fBBEF * fAAEF * 1 / 4 +
fBBEF * fABEF * 1 / 8 + fBBEF * fBBEF * 0 + fBBEF * fAAFF * 0 + fBBEF * fABFF * 0 +
fBBEF * fBBFF * 0 + fAAFF * fAAEE * 0 + fAAFF * fABEE * 0 + fAAFF * fBBEE * 0 +
fAAFF * fAAEF * 0 + fAAFF * fABEF * 0 + fAAFF * fBBEF * 0 + fAAFF * fAAFF * 0 +
fAAFF * fABFF * 0 + fAAFF * fBBFF * 0 + fABFF * fAAEE * 0 + fABFF * fABEE * 0 +
fABFF * fBBEE * 0 + fABFF * fAAEF * 0 + fABFF * fABEF * 0 + fABFF * fBBEF * 0 +
fABFF * fAAFF * 0 + fABFF * fABFF * 0 + fABFF * fBBFF * 0 + fBBFF * fAAEE * 0 +
fBBFF * fABEE * 0 + fBBFF * fBBEE * 0 + fBBFF * fAAEF * 0 + fBBFF * fABEF * 0 +
fBBFF * fBBEF * 0 + fBBFF * fAAFF * 0 + fBBFF * fABFF * 0 + fBBFF * fBBFF * 0 + 0]
fBBEE_drive = FullSimplify[fAAEE * fAAEE * 0 + fAAEE * fABEE * 0 + fAAEE * fBBEE * 0 +
fAAEE * fAAEF * 0 + fAAEE * fABEF * 0 + fAAEE * fBBEF * 0 + fAAEE * fAAFF * 0 +
fAAEE * fABFF * 0 + fAAEE * fBBFF * 0 + fABEE * fAAEE * 0 + fABEE * fABEE * d0 / 2 +
fABEE * fBBEE * d0 + fABEE * fAAEF * 0 + fABEE * fABEF * (d0 / 4) +
fABEE * fBBEF * d0 / 2 + fABEE * fAAFF * 0 + fABEE * fABFF * 0 + fABEE * fBBFF * 0 +
fBBEE * fAAEE * 0 + fBBEE * fABEE * 1 / 2 + fBBEE * fBBEE * 1 + fBBEE * fAAEF * 0 +
fBBEE * fABEF * 1 / 4 + fBBEE * fBBEF * 1 / 2 + fBBEE * fAAFF * 0 + fBBEE * fABFF * 0 +
fBBEE * fBBFF * 0 + fAAEF * fAAEE * 0 + fAAEF * fABEE * 0 + fAAEF * fBBEE * 0 +
fAAEF * fAAEF * 0 + fAAEF * fABEF * 0 + fAAEF * fBBEF * 0 + fAAEF * fAAFF * 0 +
fAAEF * fABFF * 0 + fAAEF * fBBFF * 0 + fABEF * fAAEE * 0 + fABEF * fABEE * (d0 / 4) +
fABEF * fBBEE * d0 / 2 + fABEF * fAAEF * 0 + fABEF * fABEF * (d0 / 8) +
fABEF * fBBEF * d0 / 4 + fABEF * fAAFF * 0 + fABEF * fABFF * 0 + fABEF * fBBFF * 0 +
fBBEF * fAAEE * 0 + fBBEF * fABEE * 1 / 4 + fBBEF * fBBEE * 1 / 2 + fBBEF * fAAEF * 0 +
fBBEF * fABEF * 1 / 8 + fBBEF * fBBEF * 1 / 4 + fBBEF * fAAFF * 0 + fBBEF * fABFF * 0 +
fBBEF * fBBFF * 0 + fAAFF * fAAEE * 0 + fAAFF * fABEE * 0 + fAAFF * fBBEE * 0 +
fAAFF * fAAEF * 0 + fAAFF * fABEF * 0 + fAAFF * fBBEF * 0 + fAAFF * fAAFF * 0 +
fAAFF * fABFF * 0 + fAAFF * fBBFF * 0 + fABFF * fAAEE * 0 + fABFF * fABEE * 0 +
fABFF * fBBEE * 0 + fABFF * fAAEF * 0 + fABFF * fABEF * 0 + fABFF * fBBEF * 0 +
fABFF * fAAFF * 0 + fABFF * fABFF * 0 + fABFF * fBBFF * 0 + fBBFF * fAAEE * 0 +
fBBFF * fABEE * 0 + fBBFF * fBBEE * 0 + fBBFF * fAAEF * 0 + fBBFF * fABEF * 0 +
fBBFF * fBBEF * 0 + fBBFF * fAAFF * 0 + fBBFF * fABFF * 0 + fBBFF * fBBFF * 0 + 0]
fAAEF_drive = FullSimplify[fAAEE * fAAEE * 0 + fAAEE * fABEE * 0 + fAAEE * fBBEE * 0 +
fAAEE * fAAEF * 1 / 2 + fAAEE * fABEF * 1 / 4 + fAAEE * fBBEF * 0 + fAAEE * fAAFF * 1 +

```

```

fAAEE * fABFF * 1 / 2 + fAAEE * fBBFF * 0 + fABEE * fAAEE * 0 + fABEE * fABEE * 0 +
fABEE * fBBEE * 0 + fABEE * fAAEF * (1 - d1) / 2 + fABEE * fABEF * (1 - d1) / 4 +
fABEE * fBBEF * 0 + fABEE * fAAFF * (1 - d1) + fABEE * fABFF * (1 - d1) / 2 +
fABEE * fBBFF * 0 + fBBEE * fAAEE * 0 + fBBEE * fABEE * 0 + fBBEE * fBBEE * 0 +
fBBEE * fAAEF * 0 + fBBEE * fABEF * 0 + fBBEE * fBBEF * 0 + fBBEE * fAAFF * 0 +
fBBEE * fABFF * 0 + fBBEE * fBBFF * 0 + fAAEF * fAAEE * 1 / 2 + fAAEF * fABEE * 1 / 4 +
fAAEF * fBBEE * 0 + fAAEF * fAAEF * 1 / 2 + fAAEF * fABEF * 1 / 4 + fAAEF * fBBEF * 0 +
fAAEF * fAAFF * 1 / 2 + fAAEF * fABFF * 1 / 4 + fAAEF * fBBFF * 0 + fABEF * fAAEE * (1 - d0) / 2 +
fABEF * fABEE * (1 - d0) / 4 + fABEF * fBBEE * 0 + fABEF * fAAEF * ((1 - d0) / 4 + (1 - d1) / 4) +
fABEF * fABEF * ((1 - d0) / 8 + (1 - d1) / 8) + fABEF * fBBEF * 0 + fABEF * fAAFF * (1 - d1) / 2 +
fABEF * fABFF * (1 - d1) / 4 + fABEF * fBBFF * 0 + fBBEF * fAAEE * 0 + fBBEF * fABEE * 0 +
fBBEF * fBBEE * 0 + fBBEF * fAAEF * 0 + fBBEF * fABEF * 0 + fBBEF * fBBEF * 0 +
fBBEF * fAAFF * 0 + fBBEF * fABFF * 0 + fBBEF * fBBFF * 0 + fAAFF * fAAEE * 1 +
fAAFF * fABEE * 1 / 2 + fAAFF * fBBEE * 0 + fAAFF * fAAEF * 1 / 2 + fAAFF * fABEF * 1 / 4 +
fAAFF * fBBEF * 0 + fAAFF * fAAFF * 0 + fAAFF * fABFF * 0 + fAAFF * fBBFF * 0 +
fABFF * fAAEE * d0 + fABFF * fABEE * (1 - d0) / 2 + fABFF * fBBEE * 0 +
fABFF * fAAEF * (1 - d0) / 2 + fABFF * fABEF * (1 - d0) / 4 + fABFF * fBBEF * 0 +
fABFF * fAAFF * 0 + fABFF * fABFF * 0 + fABFF * fBBFF * 0 + fBBFF * fAAEE * 0 +
fBBFF * fABEE * 0 + fBBFF * fBBEE * 0 + fBBFF * fAAEF * 0 + fBBFF * fABEF * 0 +
fBBFF * fBBEF * 0 + fBBFF * fAAFF * 0 + fBBFF * fABFF * 0 + fBBFF * fBBFF * 0 + 0]
fABEF_Drive = FullSimplify[fAAEE * fAAEE * 0 + fAAEE * fABEE * 0 + fAAEE * fBBEE * 0 +
fAAEE * fAAEF * 0 + fAAEE * fABEF * 1 / 4 + fAAEE * fBBEF * 1 / 2 + fAAEE * fAAFF * 0 +
fAAEE * fABFF * 1 / 2 + fAAEE * fBBFF * 1 + fABEE * fAAEE * 0 + fABEE * fABEE * 0 +
fABEE * fBBEE * 0 + fABEE * fAAEF * d1 / 2 + fABEE * fABEF * 1 / 4 +
fABEE * fBBEF * (1 - d1) / 2 + fABEE * fAAFF * d1 + fABEE * fABFF * 1 / 2 +
fABEE * fBBFF * (1 - d1) + fBBEE * fAAEE * 0 + fBBEE * fABEE * 0 + fBBEE * fBBEE * 0 +
fBBEE * fAAEF * 1 / 2 + fBBEE * fABEF * 1 / 4 + fBBEE * fBBEF * 0 + fBBEE * fAAFF * 1 +
fBBEE * fABFF * 1 / 2 + fBBEE * fBBFF * 0 + fAAEF * fAAEE * 0 + fAAEF * fABEE * 1 / 4 +
fAAEF * fBBEE * 1 / 2 + fAAEF * fAAEF * 0 + fAAEF * fABEF * 1 / 4 + fAAEF * fBBEF * 1 / 2 +
fAAEF * fAAFF * 0 + fAAEF * fABFF * 1 / 4 + fAAEF * fBBFF * 1 / 2 + fABEF * fAAEE * d0 / 2 +
fABEF * fABEE * 1 / 4 + fABEF * fBBEE * (1 - d0) / 2 + fABEF * fAAEF * (d0 / 4 + d1 / 4) +
fABEF * fABEF * 1 / 4 + fABEF * fBBEF * ((1 - d0) / 4 + (1 - d1) / 4) + fABEF * fAAFF * d1 / 2 +
fABEF * fABFF * 1 / 4 + fABEF * fBBFF * (1 - d1) / 2 + fBBEF * fAAEE * 1 / 2 +
fBBEF * fABEE * 1 / 4 + fBBEF * fBBEE * 0 + fBBEF * fAAEF * 1 / 2 + fBBEF * fABEF * 1 / 4 +
fBBEF * fBBEF * 0 + fBBEF * fAAFF * 1 / 2 + fBBEF * fABFF * 1 / 4 + fBBEF * fBBFF * 0 +
fAAFF * fAAEE * 0 + fAAFF * fABEE * 1 / 2 + fAAFF * fBBEE * 1 + fAAFF * fAAEF * 0 +
fAAFF * fABEF * 1 / 4 + fAAFF * fBBEF * 1 / 2 + fAAFF * fAAFF * 0 + fAAFF * fABFF * 0 +
fAAFF * fBBFF * 0 + fABFF * fAAEE * (1 - d0) + fABFF * fABEE * 1 / 2 + fABFF * fBBEE * d0 +
fABFF * fAAEF * d0 / 2 + fABFF * fABEF * 1 / 4 + fABFF * fBBEF * (1 - d0) / 2 +
fABFF * fAAFF * 0 + fABFF * fABFF * 0 + fABFF * fBBFF * 0 + fBBFF * fAAEE * 1 +
fBBFF * fABEE * 1 / 2 + fBBFF * fBBEE * 0 + fBBFF * fAAEF * 1 / 2 + fBBFF * fABEF * 1 / 4 +
fBBFF * fBBEF * 0 + fBBFF * fAAFF * 0 + fBBFF * fABFF * 0 + fBBFF * fBBFF * 0 + 0]
fBBEF_Drive = FullSimplify[fAAEE * fAAEE * 0 + fAAEE * fABEE * 0 + fAAEE * fBBEE * 0 +
fAAEE * fAAEF * 0 + fAAEE * fABEF * 0 + fAAEE * fBBEF * 0 + fAAEE * fAAFF * 0 +
fAAEE * fABFF * 0 + fAAEE * fBBFF * 0 + fABEE * fAAEE * 0 + fABEE * fABEE * 0 +
fABEE * fBBEE * 0 + fABEE * fAAEF * 0 + fABEE * fABEF * d1 / 4 + fABEE * fBBEF * d1 / 2 +
fABEE * fAAFF * 0 + fABEE * fABFF * d1 / 2 + fABEE * fBBFF * d1 + fBBEE * fAAEE * 0 +
fBBEE * fABEE * 0 + fBBEE * fBBEE * 0 + fBBEE * fAAEF * 0 + fBBEE * fABEF * 1 / 4 +
fBBEE * fBBEF * 1 / 2 + fBBEE * fAAFF * 0 + fBBEE * fABFF * 1 / 2 + fBBEE * fBBFF * 1 +
fAAEF * fAAEE * 0 + fAAEF * fABEE * 0 + fAAEF * fBBEE * 0 + fAAEF * fAAEF * 0 +
fAAEF * fABEF * 0 + fAAEF * fBBEF * 0 + fAAEF * fAAFF * 0 + fAAEF * fABFF * 0 +
fAAEF * fBBFF * 0 + fABEF * fAAEE * 0 + fABEF * fABEE * (d0 / 4) + fABEF * fBBEE * (d0 / 2) +
fABEF * fAAEF * 0 + fABEF * fABEF * (d0 / 8 + d1 / 8) + fABEF * fBBEF * (d0 / 4 + d1 / 4) +
fABEF * fAAFF * 0 + fABEF * fABFF * d1 / 4 + fABEF * fBBFF * (d1 / 2) +
fBBEF * fAAEE * 0 + fBBEF * fABEE * 1 / 4 + fBBEF * fBBEE * 1 / 2 + fBBEF * fAAEF * 0 +

```



$$\begin{aligned}
& \text{fABEE} * \text{fAAFF} * 0 + \text{fABEE} * \text{fABFF} * 0 + \text{fABEE} * \text{fBBFF} * 0 + \text{fBBEE} * \text{fAAEE} * 0 + \\
& \text{fBBEE} * \text{fABEE} * 0 + \text{fBBEE} * \text{fBBEE} * 0 + \text{fBBEE} * \text{fAAEF} * 0 + \text{fBBEE} * \text{fABEF} * 0 + \\
& \text{fBBEE} * \text{fBBEF} * 0 + \text{fBBEE} * \text{fAAFF} * 0 + \text{fBBEE} * \text{fABFF} * 0 + \text{fBBEE} * \text{fBBFF} * 0 + \\
& \text{fAAEF} * \text{fAAEE} * 0 + \text{fAAEF} * \text{fABEE} * 0 + \text{fAAEF} * \text{fBBEE} * 0 + \text{fAAEF} * \text{fAAEF} * 0 + \\
& \text{fAAEF} * \text{fABEF} * 0 + \text{fAAEF} * \text{fBBEF} * 0 + \text{fAAEF} * \text{fAAFF} * 0 + \text{fAAEF} * \text{fABFF} * 0 + \\
& \text{fAAEF} * \text{fBBFF} * 0 + \text{fABEF} * \text{fAAEE} * 0 + \text{fABEF} * \text{fABEE} * 0 + \text{fABEF} * \text{fBBEE} * 0 + \\
& \text{fABEF} * \text{fAAEF} * 0 + \text{fABEF} * \text{fABEF} * d1 / 8 + \text{fABEF} * \text{fBBEF} * d1 / 4 + \\
& \text{fABEF} * \text{fAAFF} * 0 + \text{fABEF} * \text{fABFF} * d1 / 4 + \text{fABEF} * \text{fBBFF} * d1 / 2 + \\
& \text{fBBEF} * \text{fAAEE} * 0 + \text{fBBEF} * \text{fABEE} * 0 + \text{fBBEF} * \text{fBBEE} * 0 + \text{fBBEF} * \text{fAAEF} * 0 + \\
& \text{fBBEF} * \text{fABEF} * 1 / 8 + \text{fBBEF} * \text{fBBEF} * 1 / 4 + \text{fBBEF} * \text{fAAFF} * 0 + \text{fBBEF} * \text{fABFF} * 1 / 4 + \\
& \text{fBBEF} * \text{fBBFF} * 1 / 2 + \text{fAAFF} * \text{fAAEE} * 0 + \text{fAAFF} * \text{fABEE} * 0 + \text{fAAFF} * \text{fBBEE} * 0 + \\
& \text{fAAFF} * \text{fAAEF} * 0 + \text{fAAFF} * \text{fABEF} * 0 + \text{fAAFF} * \text{fBBEF} * 0 + \text{fAAFF} * \text{fAAFF} * 0 + \\
& \text{fAAFF} * \text{fABFF} * 0 + \text{fAAFF} * \text{fBBFF} * 0 + \text{fABFF} * \text{fAAEE} * 0 + \text{fABFF} * \text{fABEE} * 0 + \\
& \text{fABFF} * \text{fBBEE} * 0 + \text{fABFF} * \text{fAAEF} * 0 + \text{fABFF} * \text{fABEF} * d1 / 4 + \text{fABFF} * \text{fBBEF} * d1 / 2 + \\
& \text{fABFF} * \text{fAAFF} * 0 + \text{fABFF} * \text{fABFF} * d1 / 2 + \text{fABFF} * \text{fBBFF} * (d1) + \text{fBBFF} * \text{fAAEE} * 0 + \\
& \text{fBBFF} * \text{fABEE} * 0 + \text{fBBFF} * \text{fBBEE} * 0 + \text{fBBFF} * \text{fAAEF} * 0 + \text{fBBFF} * \text{fABEF} * 1 / 4 + \\
& \text{fBBFF} * \text{fBBEF} * 1 / 2 + \text{fBBFF} * \text{fAAFF} * 0 + \text{fBBFF} * \text{fABFF} * 1 / 2 + \text{fBBFF} * \text{fBBFF} * 1 + 0] \\
& \frac{1}{8} (4 \text{fAAEE} + 2 (\text{fAAEF} + \text{fABEE}) + \text{fABEF}) (2 \text{fAAEE} + \text{fAAEF} - (-1 + d0) (2 \text{fABEE} + \text{fABEF})) \\
& \frac{1}{8} (\text{fAAEF} (2 \text{fABEE} + 4 d0 \text{fABEE} + \text{fABEF} + 2 d0 \text{fABEF} + 8 \text{fBBEE} + 4 \text{fBBEF}) + \\
& \quad 2 \text{fAAEE} ((2 + 4 d0) \text{fABEE} + \text{fABEF} + 2 d0 \text{fABEF} + 8 \text{fBBEE} + 4 \text{fBBEF}) + \\
& \quad (2 \text{fABEE} + \text{fABEF}) (2 \text{fABEE} + \text{fABEF} - (-3 + 2 d0) (2 \text{fBBEE} + \text{fBBEF}))) \\
& \frac{1}{8} (d0 (2 \text{fABEE} + \text{fABEF}) + 2 \text{fBBEE} + \text{fBBEF}) (2 \text{fABEE} + \text{fABEF} + 4 \text{fBBEE} + 2 \text{fBBEF}) \\
& \frac{1}{8} (4 \text{fAAEF}^2 + 2 \text{fAAEE} (4 \text{fAAEF} + 8 \text{fAAFF} + 3 \text{fABEF} - 2 d0 \text{fABEF} + 2 \text{fABFF} + 4 d0 \text{fABFF}) - \\
& \quad (2 \text{fABEE} + \text{fABEF}) ((-6 + 4 d1) \text{fAAFF} + (-2 + d0 + d1) (\text{fABEF} + 2 \text{fABFF})) + \\
& \quad \text{fAAEF} (8 \text{fAAFF} - 2 ((-3 + 2 d1) \text{fABEE} + (-3 + d0 + d1) \text{fABEF} + (-3 + 2 d0) \text{fABFF}))) \\
& \frac{1}{4} (2 \text{fABEE} \text{fABEF} + \text{fABEF}^2 + 4 \text{fABEE} \text{fABFF} + 2 \text{fABEF} \text{fABFF} + 3 \text{fABEF} \text{fBBEE} - \\
& \quad 2 d0 \text{fABEF} \text{fBBEE} + 2 \text{fABFF} \text{fBBEE} + 4 d0 \text{fABFF} \text{fBBEE} + 3 \text{fABEE} \text{fBBEF} - \\
& \quad 2 d1 \text{fABEE} \text{fBBEF} + 3 \text{fABEF} \text{fBBEF} - d0 \text{fABEF} \text{fBBEF} - d1 \text{fABEF} \text{fBBEF} + 3 \text{fABFF} \text{fBBEF} - \\
& \quad 2 d0 \text{fABFF} \text{fBBEF} + \text{fAAFF} ((2 + 4 d1) \text{fABEE} + \text{fABEF} + 2 d1 \text{fABEF} + 8 \text{fBBEE} + 4 \text{fBBEF}) - \\
& \quad (-3 + 2 d1) (2 \text{fABEE} + \text{fABEF}) \text{fBBFF} + \\
& \quad \text{fAAEE} (\text{fABEF} + 2 d0 \text{fABEF} + 6 \text{fABFF} - 4 d0 \text{fABFF} + 4 \text{fBBEF} + 8 \text{fBBFF}) + \text{fAAEF} \\
& \quad (\text{fABEE} + 2 d1 \text{fABEE} + (1 + d0 + d1) \text{fABEF} + \text{fABFF} + 2 d0 \text{fABFF} + 4 (\text{fBBEE} + \text{fBBEF} + \text{fBBFF}))) \\
& \frac{1}{8} (d0 (\text{fABEF}^2 + 2 \text{fABEE} (\text{fABEF} + 2 \text{fABFF}) + \\
& \quad 4 \text{fABFF} (-2 \text{fBBEE} + \text{fBBEF}) + 2 \text{fABEF} (\text{fABFF} + 2 \text{fBBEE} + \text{fBBEF})) + \\
& \quad 2 (\text{fABFF} (6 \text{fBBEE} + \text{fBBEF}) + \text{fABEF} (\text{fBBEE} + \text{fBBEF} + \text{fBBFF}) + \\
& \quad (\text{fABEE} + 4 \text{fBBEE} + 2 \text{fBBEF}) (\text{fBBEF} + 2 \text{fBBFF})) + \\
& \quad d1 (2 \text{fABEE} + \text{fABEF}) (\text{fABEF} + 2 (\text{fABFF} + \text{fBBEF} + 2 \text{fBBFF}))) \\
& \frac{1}{8} (2 \text{fAAEF} + 4 \text{fAAFF} + \text{fABEF} + 2 \text{fABFF}) (\text{fAAEF} + 2 \text{fAAFF} - (-1 + d1) (\text{fABEF} + 2 \text{fABFF}))
\end{aligned}$$

$$\frac{1}{8} (fAAEF (fABEF + 2 d1 fABEF + 2 fABFF + 4 d1 fABFF + 4 fBBEF + 8 fBBFF) +$$

$$2 fAAFF (fABEF + 2 d1 fABEF + 2 fABFF + 4 d1 fABFF + 4 fBBEF + 8 fBBFF) +$$

$$(fABEF + 2 fABFF) (fABEF + 2 fABFF - (-3 + 2 d1) (fBBEF + 2 fBBFF)))$$

$$\frac{1}{8} (d1 (fABEF + 2 fABFF) + fBBEF + 2 fBBFF) (fABEF + 2 (fABFF + fBBEF + 2 fBBFF))$$

## Selection

```
WAAEE = WAAEF = WAAFF = 1;
WABEE = WABEF = WABFF = 1 - hs;
WBBEE = WBBEF = WBBFF = 1 - s;
```

```
 $\bar{W}$  = FullSimplify[(fAAEEDrive WAAEE + fAAEFDrive WAAEF + fAAFFDrive WAAFF
+ fABEEDrive WABEE + fABEFDrive WABEF + fABFFDrive WABFF
+ fBBEEDrive WBBEE + fBBEFDrive WBBEF + fBBFFDrive WBBFF
)];
```

```
fAAEESel = FullSimplify[fAAEEDrive WAAEE /  $\bar{W}$ ];
```

```
fABEESel = FullSimplify[fABEEDrive WABEE /  $\bar{W}$ ];
```

```
fBBEESel = FullSimplify[fBBEEDrive WBBEE /  $\bar{W}$ ];
```

```
fAAEFSel = FullSimplify[fAAEFDrive WAAEF /  $\bar{W}$ ];
```

```
fABEFSel = FullSimplify[fABEFDrive WABEF /  $\bar{W}$ ];
```

```
fBBEFSel = FullSimplify[fBBEFDrive WBBEF /  $\bar{W}$ ];
```

```
fAAFFSel = FullSimplify[fAAFFDrive WAAFF /  $\bar{W}$ ];
```

```
fABFFSel = FullSimplify[fABFFDrive WABFF /  $\bar{W}$ ];
```

```
fBBFFSel = FullSimplify[fBBFFDrive WBBFF /  $\bar{W}$ ];
```

```
fASel = FullSimplify[fAAEESel + fAAEFSel + fAAFFSel + (fABEESel + fABEFSel + fABFFSel) / 2];
```

```
fBSel = FullSimplify[fBBEESel + fBBEFSel + fBBFFSel + (fABEESel + fABEFSel + fABFFSel) / 2];
```

```
fESel = FullSimplify[fAAEESel + fABEESel + fBBEESel + (fAAEFSel + fABEFSel + fBBEFSel) / 2];
```

```
fFSel = FullSimplify[fAAFFSel + fABFFSel + fBBFFSel + (fAAEFSel + fABEFSel + fBBEFSel) / 2];
```

```
 $\Delta fA$  = FullSimplify[fASel - fA];
```

```
 $\Delta fB$  = FullSimplify[fBSel - fB];
```

```
 $\Delta fE$  = FullSimplify[fESel - fE];
```

```
 $\Delta fF$  = FullSimplify[fFSel - fF];
```

```
(* $\Delta fC$  = FullSimplify[fCSel - fC]; *)
```

```
(*Check: do genotype freqs after selection sum to one?*)
```

```
FullSimplify[fASel + fBSel]
```

```
FullSimplify[fESel + fFSel]
```

```
1
```

```
1
```

## Analysis

### Invasion of sperm-acting drive modifier unlinked to the driver

```

invasionOfUnlinkedModeifier =
  FullSimplify[ $\bar{W} \Delta f_F / f_F /. \text{randomHaps} /. D \rightarrow 0 /. \text{sum2one} /. \text{minormod}$ ] /.
  fF  $\rightarrow 0$  (*this assumes no LD and random mating*)
- (-1 + fB) fB ((-1 + 2 fB) hs - fB s)  $\epsilon$ 

(*With some rearrangement,
  invasionOfUnlinkedModeifier =  $-\epsilon f_A f_B (f_B s + (f_A - f_B) hs)$ )
  So long as  $sh \leq s$ , [
  i.e. the driver does not have an underdominant effect on fitness] this is
  guaranteed to be positive when  $\epsilon$  is negative [i.e. the modifier dampens drive]*)

```

### Fixation of sperm-acting drive modifier unlinked to the driver

```

fixationOfUnlinkedModeifier = FullSimplify[
  FullSimplify[ $\bar{W} \Delta f_F / (1 - f_F) /. \text{randomHaps} /. D \rightarrow 0 /. \text{sum2one} /. \text{minormod}$ ] /. fF  $\rightarrow 1$ ]
  (*this assumes no LD and random mating*)
(-1 + fB) fB (hs - 2 fB hs + fB s)  $\epsilon$ 

(*Thus the invasion and fixation conditions are equivalent*)

```
